RESEARCH ARTICLE

# Deceptive Desmas: Molecular Phylogenetics Suggests a New Classification and Uncovers Convergent Evolution of Lithistid Demosponges

Astrid Schuster<sup>1,2</sup>, Dirk Erpenbeck<sup>1,3</sup>, Andrzej Pisera<sup>4</sup>, John Hooper<sup>5,6</sup>, Monika Bryce<sup>5,7</sup>, Jane Fromont<sup>7</sup>, Gert Wörheide<sup>1,2,3\*</sup>

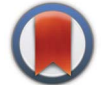

CrossMark  
click for updates

**OPEN ACCESS**

**Citation:** Schuster A, Erpenbeck D, Pisera A, Hooper J, Bryce M, et al. (2015) Deceptive Desmas: Molecular Phylogenetics Suggests a New Classification and Uncovers Convergent Evolution of Lithistid Demosponges. PLoS ONE 10(1): e116038. doi:10.1371/journal.pone.0116038

**Editor:** Mikhail V. Matz, University of Texas, United States of America

**Received:** July 3, 2014

**Accepted:** November 30, 2014

**Published:** January 7, 2015

**Copyright:** © 2015 Schuster et al. This is an open-access article distributed under the terms of the [Creative Commons Attribution License](https://creativecommons.org/licenses/by/4.0/), which permits unrestricted use, distribution, and reproduction in any medium, provided the original author and source are credited.

**Data Availability:** The authors confirm that all data underlying the findings are fully available without restriction. New sequences from this study are available from the European Nucleotide Archive (ENA) under the accession numbers LN624145-LN624186 (<http://www.ebi.ac.uk/ena/data/view/LN624145-LN624186>) for the 28S rDNA gene and LN624187-LN624215 (<http://www.ebi.ac.uk/ena/data/view/LN624187-LN624215>) for the CO1 gene. Additionally, all CO1 barcoding sequences and additional specimen-specific data are available at the Sponge Barcoding Database (SBD): <http://www.spongebarcoding.org/> (record numbers 1122 to 1150). The alignments and the morphological data matrix in Nexus format are freely available at OpenDataLMU (<http://dx.doi.org/10.5282/ubm/data.66>).

**Funding:** AS wants to thank PROSALMU for financing the research visit to the Institute of Palaeobiology in Poland, the LMUMentoring GeoSciences program for funding her attendance to the 9th World Sponge Conference and the

1. Department of Earth- & Environmental Sciences, Palaeontology and Geobiology, Ludwig-Maximilians-Universität München, Richard-Wagner Str. 10, 80333 Munich, Germany, 2. SNSB – Bavarian State Collections of Palaeontology and Geology, Richard-Wagner Str. 10, 80333 Munich, Germany, 3. GeoBio-Center<sup>LMU</sup>, Ludwig-Maximilians-Universität München, Richard-Wagner Str. 10, 80333 Munich, Germany, 4. Institute of Paleobiology, Polish Academy of Sciences, ul. Twarda 51/55, 00-818 Warszawa, Poland, 5. Queensland Museum, PO Box 3300, South Brisbane, QLD 4101, Australia, 6. Eskitis Institute for Drug Discovery, Griffith University, Nathan, QLD 4111, Australia, 7. Department of Aquatic Zoology, Western Australian Museum, Locked Bag 49, Welshpool DC, Western Australia, 6986, Australia

\*[woerheide@lmu.de](mailto:woerheide@lmu.de)

## Abstract

Reconciling the fossil record with molecular phylogenies to enhance the understanding of animal evolution is a challenging task, especially for taxa with a mostly poor fossil record, such as sponges (Porifera). ‘Lithistida’, a polyphyletic group of recent and fossil sponges, are an exception as they provide the richest fossil record among demosponges. Lithistids, currently encompassing 13 families, 41 genera and >300 recent species, are defined by the common possession of peculiar siliceous spicules (desmas) that characteristically form rigid articulated skeletons. Their phylogenetic relationships are to a large extent unresolved and there has been no (taxonomically) comprehensive analysis to formally reallocate lithistid taxa to their closest relatives. This study, based on the most comprehensive molecular and morphological investigation of ‘lithistid’ demosponges to date, corroborates some previous weakly-supported hypotheses, and provides novel insights into the evolutionary relationships of the previous ‘order Lithistida’. Based on molecular data (partial mtDNA CO1 and 28S rDNA sequences), we show that 8 out of 13 ‘Lithistida’ families belong to the order Astrophorida, whereas Scleritodermidae and Siphonidiidae form a separate monophyletic clade within Tetractinellida. Most lithistid astrophorids are dispersed between different clades of the Astrophorida and we propose to formally reallocate them, respectively. Corallistidae, Theonellidae and Phymatellidae are monophyletic, whereas the

Sponge Training Workshop in Fremantle and Perth, Australia. The funders had no role in study design, data collection and analysis, decision to publish, or preparation of the manuscript.

**Competing Interests:** The authors have declared that no competing interests exist.

families Pleromidae and Scleritodermidae are polyphyletic. Family Desmanthidae is polyphyletic and groups within Halichondriidae – we formally propose a reallocation. The sister group relationship of the family Vetulinidae to Spongillida is confirmed and we propose here for the first time to include *Vetulina* into a new Order Sphaerocladina. Megascleres and microscleres possibly evolved and/or were lost several times independently in different 'lithistid' taxa, and microscleres might at least be four times more likely lost than megascleres. Desma spicules occasionally may have undergone secondary losses too. Our study provides a framework for further detailed investigations of this important demosponge group.

## Introduction

### Background

Demospongiae Sollas, 1885 [1], with more than 85% of all living species, represents the largest and morphologically most diverse group of the phylum Porifera [2]. Today demosponges encompass 15 orders, and more than 8,500 accepted extant species [3]. Recent molecular evidence was pivotal in the classification of Demospongiae into four major clades: Keratosa Grant, 1861 [4], Verongimorpha Erpenbeck et al., 2012 [5], Haploscleromorpha Cárdenas et al., 2012 [6] and Heteroscleromorpha Cárdenas et al., 2012 [6,7] – the latter representing the largest and evolutionary most important group within demosponges [6]. 'Lithistida' Schmidt, 1870 [8], on the other hand, until now remained a highly problematic and likely polyphyletic group of living and fossil sponges, and indeed provides the richest fossil records of all Porifera. Lithistid sponges differ from other demosponges by the unique possession of choanosomal spicules called desmas. These have been defined as “articulating choanosomal megascleres of various geometry and usually complex morphology, often secondarily modified and very irregular” [9]. Most living and fossil desma-bearing demosponges have a solid, rigid, heavily silicified skeleton – an important feature used in the morphological-based classification [9] – but a much fewer number of species have sparse, disarticulated desmas scattered throughout the mesohyl of their otherwise compressible choanosomal skeleton [10,11].

Compared to the lithistid fossil record (34 families, >300 genera [12]), the diversity of Recent species is comparatively poor (13 families and 41 genera, including five poorly known and of uncertain status) [9]. However, the Recent diversity of lithistids might extend back to the late Mesozoic in Europe (AP, unpublished results), suggesting that Recent lithistids are severely understudied [13]. 'Lithistida' inhabit tropical, subtropical and temperate regions from shallow waters to the deep sea, where they usually form faunal assemblages with other demosponges and, in the deep sea, also with hexactinellid sponges. Frequently, lithistid sponges occur on marine seamounts, their vertical slopes, on margins of continental shelves [14], and are common in submarine caves, e.g. in the

Mediterranean [15, 16] and shallow lava tubes in French Polynesia. [17]. Furthermore, some lithistids such as e.g. *Theonella swinhoei*, *Discodermia polydiscus*, *Discodermia dissoluta*, produce a wide range of bioactive compounds [18, 19] and therefore are of special interest to the biomedical industry.

### Historic taxonomic overview on lithistid demosponges

Sollas (1888) [20] undertook the first comprehensive taxonomic study of lithistid sponges, based mainly on the presence or absence of ectosomal spicules and microscleres. He created two suborders Hoplophora and Anoplia (see Fig. 1), and considered that desmas occurred as a single evolutionary event. Lithistids were suggested to form a monophyletic group together with the Choristida (=Astrophorida), with the Anoplia considered to be the end lineage with the loss of all ectosomal spicules and microscleres. Dendy (1905) [21], Schrammen (1910) [22] and Wilson (1925) [23], however, suggested 'Lithistida' were polyphyletic and criticized Sollas' classification for excluding microscleres within the concept of his suborder Anoplia. Burton (1929) [24] was the first who attempted to reallocate many lithistid genera to their closest non-lithistid families based on alleged morphological characters of the Theneidae, Pachastrellidae, Stellettidae (Choristida, = now Astrophorida), Tetillidae (Spirophorida), "Myxillae" (Poecilosclerida), Axinellidae (Halichondrida), Spirastrellidae and Polymastiidae (Hadromerida) *sensu* Burton (1929). This classification was refined by de Laubenfels (1936) [25], who established two new families: Kaliapsidae for the genera belonging to Choristida and Gastrophanellidae for genera showing affinities to the order Hadromerida. Although both classifications show conflicting results within some genera (e.g. in *Microscleroderma*), several hypotheses were similar regarding the reallocation of many lithistid taxa (see Fig. 1). Bergquist (1978) [26] subsequently argued that Burton's and de Laubenfels' hypotheses were based on weak assumptions and more material and detailed descriptions would be needed to unequivocally allocate those lithistid sponges to their closest relatives. Lévi (1973) [27] followed Burton's and de Laubenfels' assumptions and stated that all lithistid genera belonging to the families Theonellidae, Corallistidae and Pleromidae should be placed within the Choristida under the name Desmophorida. Nevertheless, he also emphasized the uncertainty of relationships between the remaining 'non-choristid' lithistids [27, 28].

Despite their long acknowledged polyphyly, and all these attempts to reallocate lithistids to alleged sister-taxa in the past, lithistid Demospongiae were maintained in a single 'order' of demosponges within the most recent comprehensive taxonomic revision of Porifera, the *Systema Porifera* [9]. This was primarily due to the many still-unresolved or contested phylogenetic hypotheses throughout the families of 'Lithistida' and incomplete independent (e.g. molecular) evidence to support or refute particular hypotheses across the 'order'.

The current classification *sensu* *Systema Porifera* [9] comprises 13 families: Azoricidae Sollas, 1888 [20], Corallistidae Sollas, 1888 [20], Desmanthidae

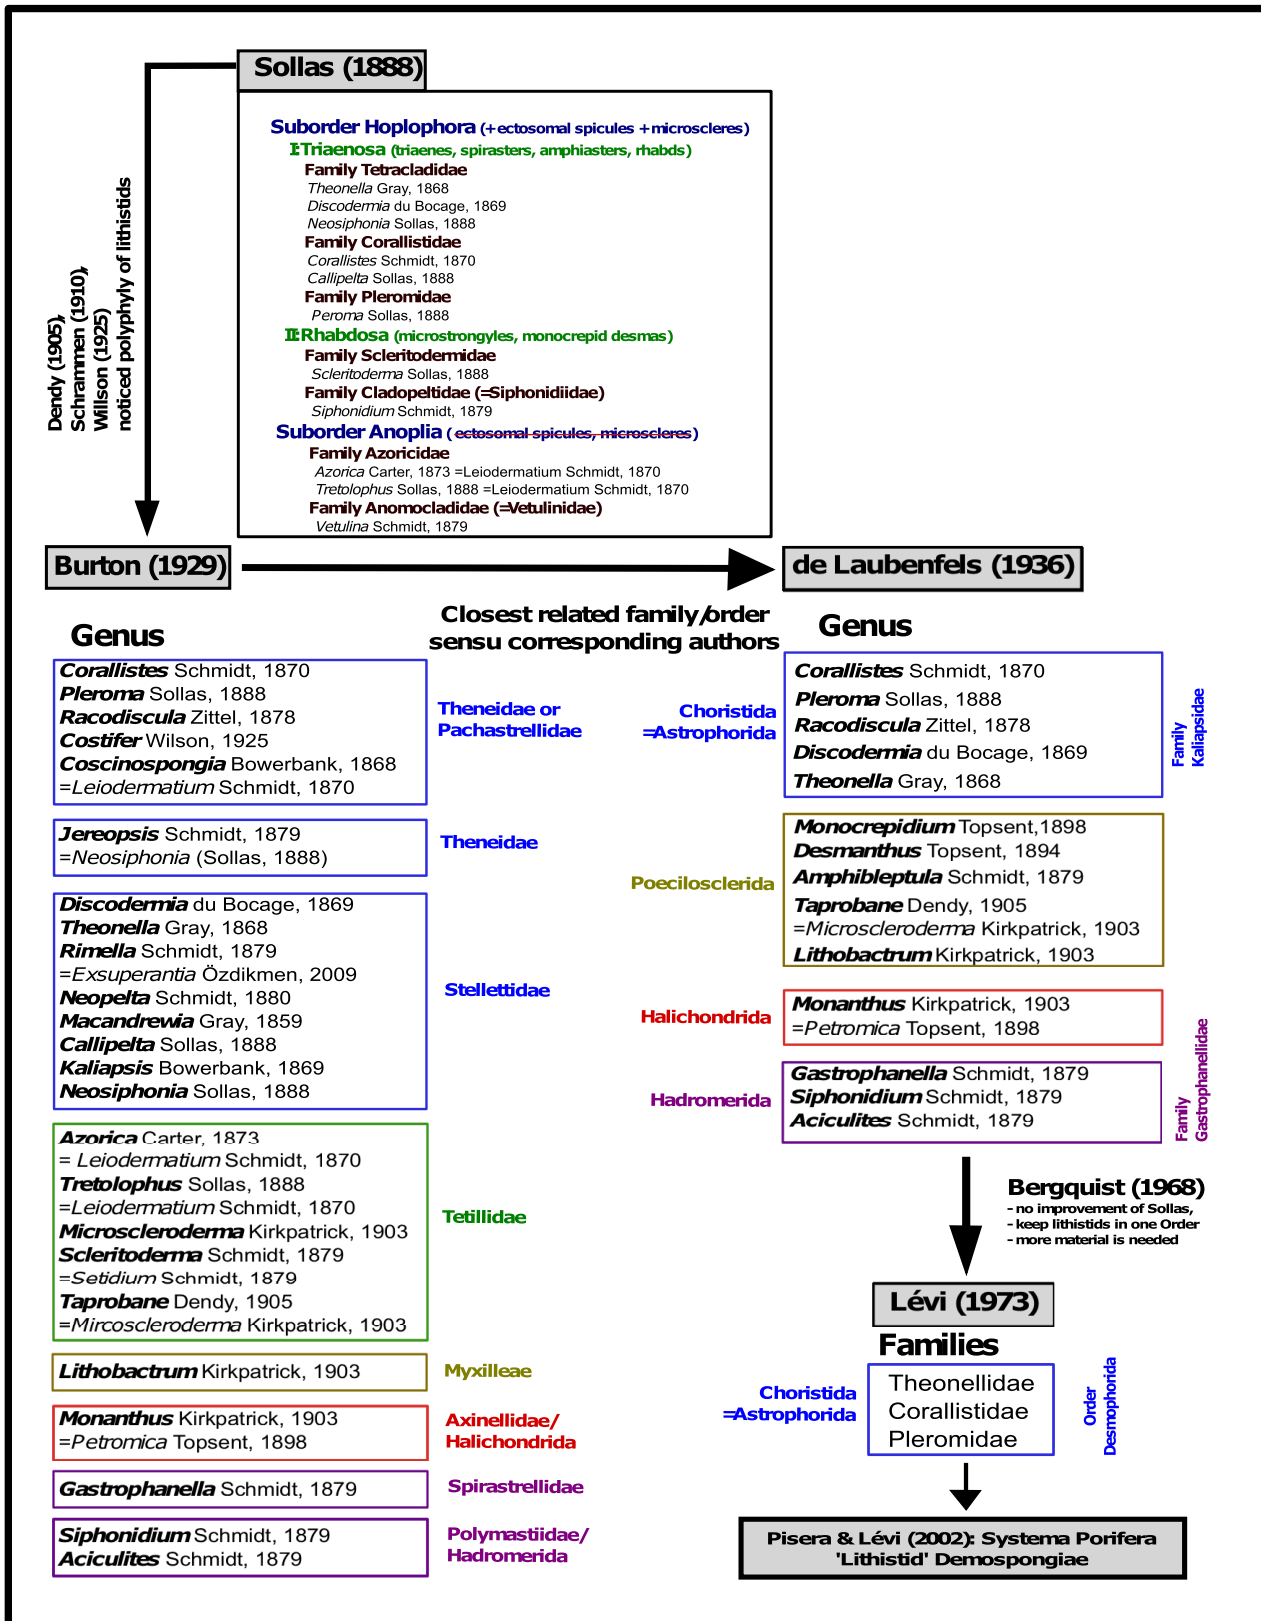

**Fig. 1. Historic taxonomic overview of lithistid demosponges.** From the monophyly suggested by Sollas (1888) to the hypotheses of polyphyly of modern authors, it shows the attempts to reallocate most genera of the order 'Lithistida' to their closest relatives.

doi:10.1371/journal.pone.0116038.g001

Topsent, 1894 [29], Isoraphiniidae Schrammen, 1924 [30], Macandrewiidae Schrammen, 1924 [30], Neopeltidae Sollas, 1888 [20], Phymaraphiniidae Schrammen, 1910 [22], Phymatellidae Schrammen, 1910 [22], Pleromidae Sollas, 1888 [20], Scleritodermidae Sollas, 1888 [20], Siphonidiidae Lendenfeld, 1903 [31], Theonellidae Lendenfeld, 1903 [31] and Vetulinidae Lendenfeld, 1903 [31]. 'Lithistida' has been shown to be polyphyletic based on morphology [22, 25, 28, 32, 33, 34] and limited molecular datasets [35, 36, 37, 38, 39], but until now not in an integrative dataset including both morphology and molecular characters.

### Morphological spicule arrangements of lithistids and spicule evolution within demosponges

Lithistid sponges present a wide array of monaxial (Fig. 2 B; Fig. 2 C, D, F), tetraaxial (Fig. 2 C–F; Fig. 3 A,B,E) and polyaxial (Fig. 2 A) desma spicules as well as desma spicules which can be disarticulated (Fig. 4 D). Ectosomal megascleres may consist of phyllo-, disco-, dico- and anatriaenes, rhabds, and oxeas (Fig. 4), and microscleres may include amphiasters, spirasters, microxeas, raphides (Fig. 4) and/or sigmaspires. A typical lithistid skeletal architecture of ectosomal megascleres is illustrated by *Pleroma turbinatum* (Fig. 4 N,O), with oxeas protruding from the choanosome followed by a layer of dichotriaenes in the ectosomal skeleton and dense megaclone desmas within the choanosomal skeleton.

Lithistid demosponges also present a high diversity of desma morphologies, megascleres, microscleres and skeletal structures. For example, *Neoschrammeniella norfolki* Schlacher-Hoenlinger, Pisera & Hooper, 2005 (Family Corallistidae) can have up to six different spicule types including megascleres and microscleres. Hence, this broad spicule diversity within lithistids and other astrophorids can be used as an appropriate tracer to study spicule evolution within demosponges. The importance of spicule homoplasy (convergent evolution and secondary losses) within demosponges is well known from several studies based on morphological and molecular characters in a variety of different sponge taxa: such as *Crambe crambe* [40, 41], in the order Astrophorida [36, 42] and many other Heteroscleromorpha [7]. It is also well known that secondary character losses in phylogenetic studies can have a fundamental influence in understanding conflicting molecular and morphological datasets [43]. However, due to low spicule diversity and few morphological characters in most non-lithistid demosponges, except for those belonging to Tetractinellida (Astrophorida + Spirophorida) [44], only little is known on how frequent secondary losses have occurred throughout Demospongiae. Recent molecular and morphological analyses of the Astrophorida [36] emphasized the repeated occurrence of

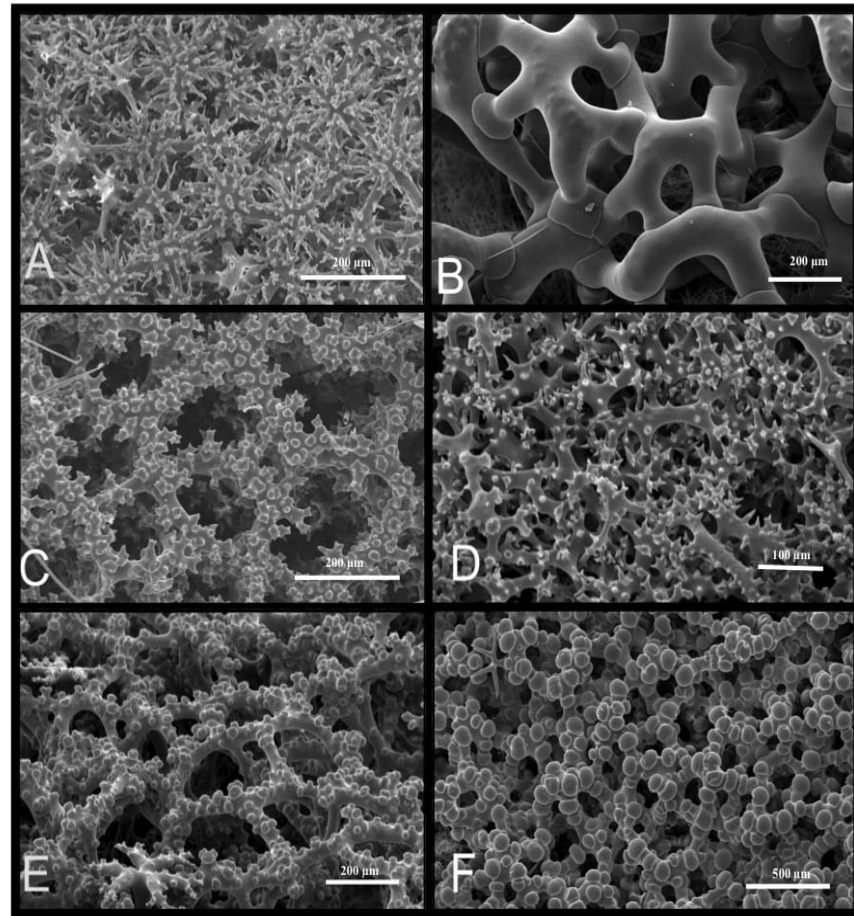

**Fig. 2. Various desma skeletons within lithistid demosponges.** (A) sphaeroclone desmas (Vetuliniidae); (B) megaclone desmas (Pleromidae); C–D rhizocclone desmas (Scleritodermidae, Azoricidae, Siphonididae); E–F dicranocclone desmas (Corallistidae).

doi:10.1371/journal.pone.0116038.g002

secondary losses of both spicule types, megacleres and microscleres, and concluded that this evolutionary process is more common in demosponges than previously thought.

### State of knowledge on the molecular phylogeny of lithistid sponges

The first molecular investigations focusing on lithistid sponges were based on a small fragment of the 18S rDNA gene (550 bp), comprising nine species representing seven different families [14]. However, the final outcome of this study was hampered due to the low variation within the selected gene region and the small taxa-set [38]. While there is a growing number of molecular phylogenies of Demospongiae using different molecular markers only few species of lithistids were included [7, 36, 38, 42, 45, 46, 47, 48]. The broadest molecular dataset for lithistid sponges was assembled during the Porifera Tree of Life project, based on a

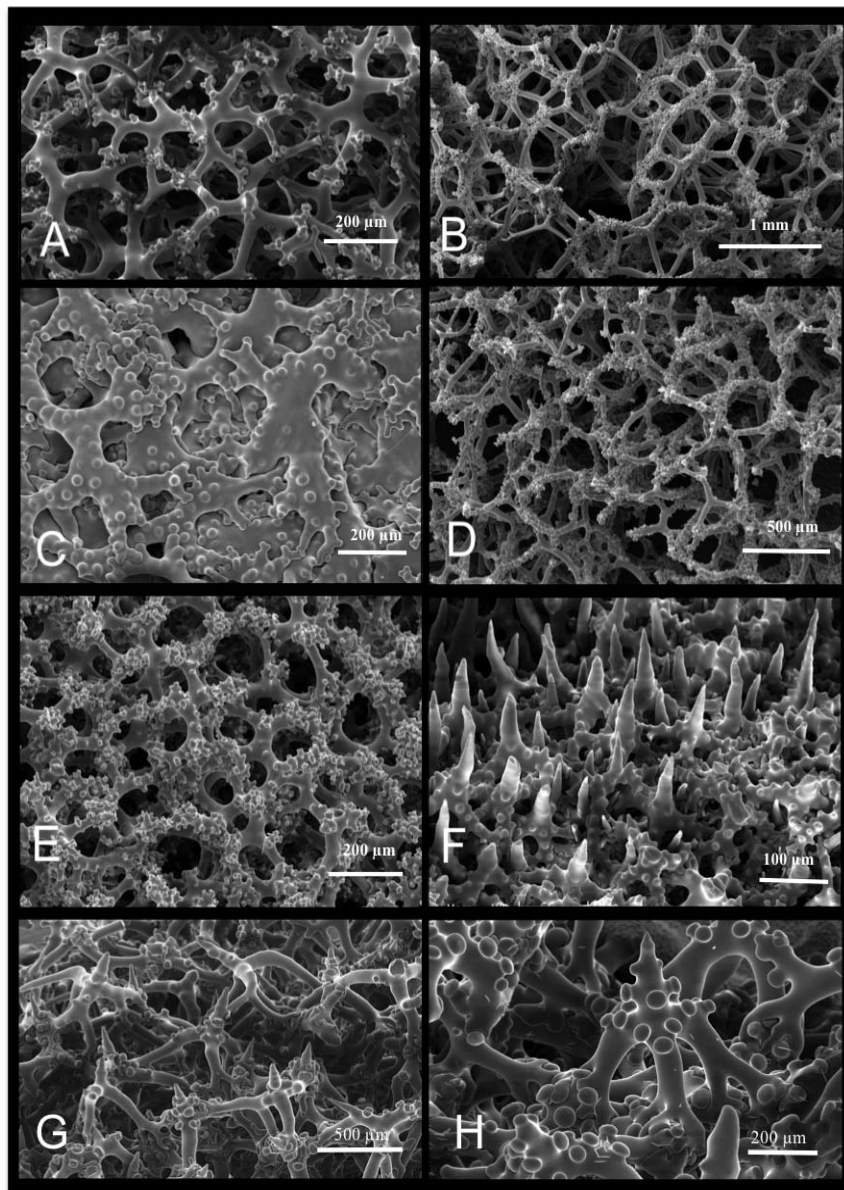

**Fig. 3. Various desma skeletons within lithistid demosponges.** (A) tetraclone desmas (Phymatellidae); (B) tetraclone desmas (Theonellidae); (C–D) monaxial complex shaped desmas (Neopeltidae); (E) complex shaped desmas (Macandrewiidae) resembling tetraclones; (F) trider-like desmas of Desmanthidae; (G–H) trider-like desmas of Phymaraphiniidae.

doi:10.1371/journal.pone.0116038.g003

nearly complete small-subunit ribosomal 18S rDNA gene, and it included 29 specimens from 12 different genera and six families [39]. Table 1 summarizes the current molecular data available in NCBI GenBank ([www.ncbi.nlm.nih.gov/genbank](http://www.ncbi.nlm.nih.gov/genbank)) for lithistid sponges (16 genera from 9 families), together with their suggested reallocation to their closest non-lithistid relatives. However, this sample size is still very small compared to the currently approx. 300 Recent described

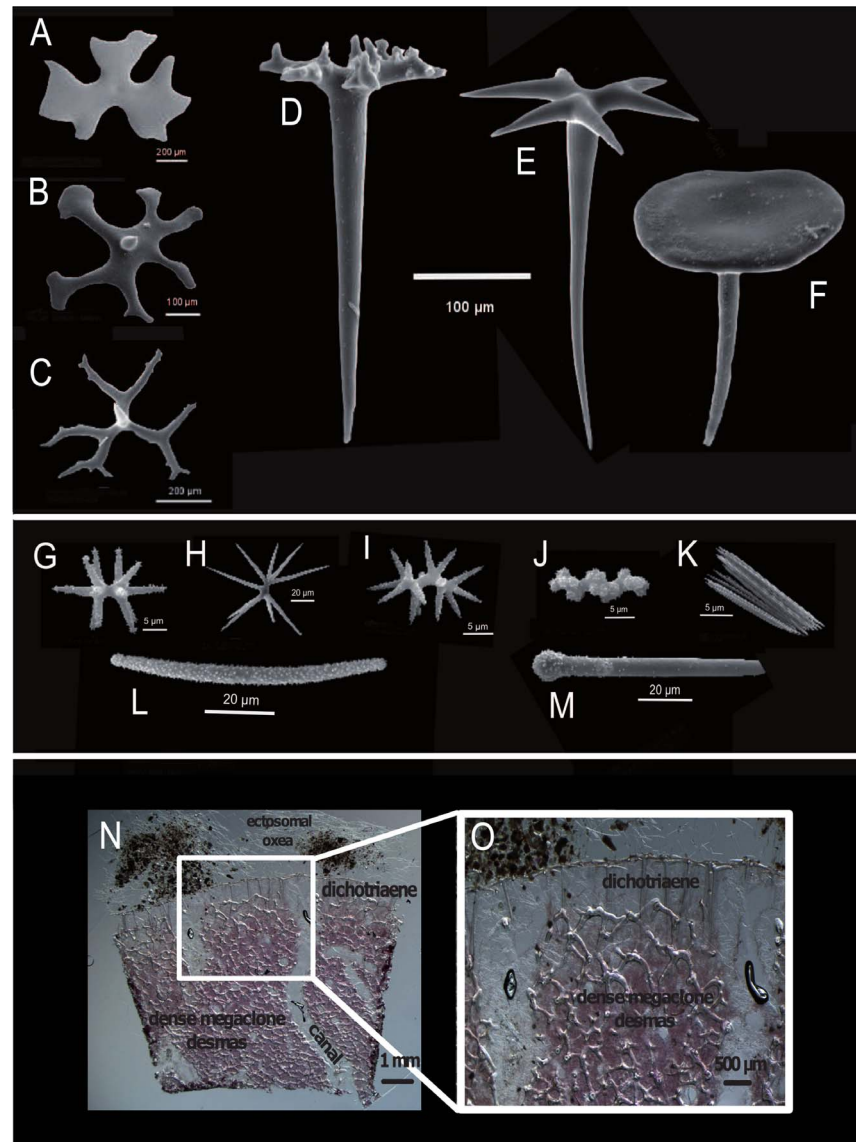

**Fig. 4. Illustration of different mega- and microscleres within lithistid demosponges. (A–F) different types of ectosomal spicules. (A):** Monaxial ectosomal plate as found in the family of Neopeltidae. (B,C): Different phyllotriaenes within the family Theonellidae. (D,E): Two representatives of dichotriaenes (D): *Neophrissospongia*, (E): Corallistidae. (F): Discotriaene as found in the family Theonellidae. **(G–M) different types of microscleres. (G):** Amphiaster (Neopeltidae). (H): Metastar (Corallistidae). (I,J): Spiraster (Corallistidae). (K): Raphids (Azoricidae). (L): acanthorhabds (Scleritodermidae). (M): Exotylostyl (Siphonididae). (N,O) cross-sections of the ectosome and upper part of choanosome showing the skeleton architecture within the family Pleromidae. (N) *Pleroma turbinatum* collected during the Deep Down Under Expedition in 2009 at the deep fore-reef slopes of the Osprey Reef (Coral Sea, Australia).

doi:10.1371/journal.pone.0116038.g004

‘valid’ species in the World Porifera Database [44], from 41 genera (plus five genera of uncertain status) and 13 families. In summary phylogenetic relationships of lithistid demosponges with non-lithistid species based on morphological



**Table 1.** The current molecular data for lithistid demosponges from GenBank, and their suggested reallocation of 9 of the 13 lithistid families to their closest non-lithistid relatives.

| Lithistid taxa           | Gene Region                   | Reallocation                | References                   |
|--------------------------|-------------------------------|-----------------------------|------------------------------|
| <b>Azoriciidae</b>       |                               |                             |                              |
| <i>Leiodermatium</i>     | 18S                           | Tetractinellida             | [14]*                        |
| <b>Corallistidae</b>     |                               |                             |                              |
| <i>Corallistes</i>       | 18S, 28S, CO1, ITS            | Astrophorida                | [39, 45, 46]                 |
| <i>Neophrissospongia</i> | 18S, 28S, CO1                 | Astrophorida                | [36, 39]                     |
| <b>Desmanthidae</b>      |                               |                             |                              |
| <i>Desmanthus</i>        | 28S, 18S                      | Dictyonellidae              | [39, 49]                     |
| <i>Petromica</i>         | 18S                           | Halichondriidae             | [14, 39]                     |
| <b>Neopeltidae</b>       |                               |                             |                              |
| <i>Callipelta</i>        | 28S, 18S                      | Astrophorida                | [39, 50]                     |
| <i>Homophymia</i>        | 18S                           | Astrophorida                | [39]                         |
| <b>Phymaraphiniidae</b>  |                               |                             |                              |
| <i>Exsuperantia</i>      | 28S, CO1, 18S                 | Astrophorida                | [14, 36]                     |
| <b>Scleritodermidae</b>  |                               |                             |                              |
| <i>Aciculites</i>        | 18S, 28S, CO1                 | Tetractinellida             | [39, 46, 48]                 |
| <i>Microscleroderma</i>  | 18S, 28S, EF1alpha, ATPSb-ill | Tetractinellida             | [7, 39, 47]                  |
| <i>Scleritoderma</i>     | 18S                           | Tetractinellida             | [14]*                        |
| <b>Siphonidiidae</b>     |                               |                             |                              |
| <i>Siphonidium</i>       | 18S                           | Spirophorida                | [14]*                        |
| <b>Theonellidae</b>      |                               |                             |                              |
| <i>Discodermia</i>       | 18S, CO1, ITS2, 28S           | Astrophorida                | [14, 36, 38, 39, 42, 45, 46] |
| <i>Manihinea</i>         | 18S                           | Astrophorida                | [39]                         |
| <i>Theonella</i>         | 18S, 28S, CO1                 | Astrophorida                | [14, 36, 38, 39, 46, 48]     |
| <b>Vetuliniidae</b>      |                               |                             |                              |
| <i>Vetulina</i>          | 18S, 28S                      | Sister-group to Spongillida | [14, 38, 39, 45, 46]         |

Sequences not in GenBank are marked with an asterisk against the corresponding references.

doi:10.1371/journal.pone.0116038.t001

data remains mostly speculative and untested by more substantial independent molecular evidence.

### Aims of this study

This study examines the molecular signatures of 68 lithistid specimens belonging to 12 of the 13 lithistid families, and 21 of the 46 known genera based on new material from different localities worldwide. The study aims to (1) establish a robust molecular phylogeny of lithistids based on independent mitochondrial protein coding (CO1, “Folmer fragment”) and nuclear ribosomal (28S rDNA, partition C1–D2) markers; (2) formally propose the reallocation of all but one lithistid family to their closest relatives, and integrate both molecular and morphological evidence; (3) study the complexity of spicule evolution within lithistid and astrophorid sponges to assess the importance of homoplasy in

megascleres and microscleres through a newly constructed morphological character data matrix.

## Materials and Methods

### Taxonomy and Sample datasets

Most of the newly sequenced material (44 out of 68 specimens) was provided by the Queensland Museum Collection (QM) (South Brisbane, Australia) and morphological description of these specimens was published by Schlacher-Hoenlinger et al. (2005) [51]. In addition, 17 specimens from the Western Australian Museum (WAM) (Perth, Australia) were included and identified to genus by one of the authors (AP). Three specimens from French Polynesia were collected by C. Debitus (GW####) and identified to genus by one of the authors (AP) [17]. Four specimens identified by R.W.M. van Soest NCB Naturalis, Leiden, The Netherlands (ZMA POR#####) were also included. Other sequence data used was acquired from GenBank (Table 2).

A list of specimens used in this study with their corresponding voucher number, locality, GenBank (GB) and European Nucleotide Archive (ENA) accession numbers are given in Tab. 2. New sequences from this study are available from the ENA under the accession numbers LN624145–LN624186 (<http://www.ebi.ac.uk/ena/data/view/LN624145-LN624186>) for the 28S gene and LN624187–LN624215 (<http://www.ebi.ac.uk/ena/data/view/LN624187-LN624215>) for the CO1 gene. Additionally, all CO1 barcoding sequences and additional specimen-specific data are available at the Sponge Barcoding Database (SBD) (<http://www.spongebarcoding.org/>) (record numbers 1122 to 1150).

### DNA extraction, amplification and sequencing

Genomic DNA was extracted using a modified [52] PALL-plate based extraction method [53] with an increased amount of tissue and twice the amount of lysis mix. In order to avoid any clogging of the membrane an additional centrifugation step was added just before transferring the lysate to the PALL-plates. For some specimens, where only little tissue was available, DNA was extracted using the NucleoSpinTissue Kit (Macherey-Nagel, Düren, Germany), following the standard protocol with an additional centrifugation step before pipetting the lysate to the Spin Column. To quantify the amount of isolated genomic DNA, a NanoDrop 1000 Spectrophotometer (Thermo Scientific) was used. The following two unlinked genes were amplified for this study: The standard DNA barcoding fragment (cytochrome oxidase subunit 1, partial; 659 bp) using the primers dgLCO1490 and dgHCO2198 [54] and following the protocol: 95°C, 3 minutes; (95°C, 30 seconds; 40–43°C, 20 seconds; 72°C, 1 minute) × 34 cycles; 72°C, 5 minutes. The 28S rDNA (partition C1–D2, 768–832 bp) was studied using the forward C1'ASTR [55] and the reverse universal D2 primers [56], with the following PCR settings of 95°C, 3 minutes; (95°C, 30 seconds; 56–59°C, 45

**Table 2.** Localities of sponge specimens, museum voucher numbers, GB and ENA accession numbers used in this study.

| Species                              | Voucher      | GB/ENA Accession Number CO1 | GB/ENA Accession Number 28S (C1–D2) | Location                                             |
|--------------------------------------|--------------|-----------------------------|-------------------------------------|------------------------------------------------------|
| <b>Family Corallistidae</b>          |              |                             |                                     |                                                      |
| <i>Herengeria auriculata</i>         | QMG318643    |                             | <b>LN624145</b>                     | Norfolk Ridge, Seamount (Pacific Ocean)              |
| <i>Herengeria auriculata</i>         | QMG318566    |                             | <b>LN624146</b>                     | Norfolk Ridge, Introuvable Seamount (Pacific Ocean)  |
| <i>Herengeria auriculata</i>         | QMG318651    |                             | <b>LN624147</b>                     | Norfolk Ridge, Seamount (Pacific Ocean)              |
| <i>Herengeria auriculata</i>         | QMG318575    |                             | <b>LN624148</b>                     | Norfolk Ridge, Eponge Seamount (S-New Caledonia)     |
| <i>Herengeria vasiformis</i>         | QMG318594    |                             | <b>LN624149</b>                     | Norfolk Ridge, Sud-NC Seamount (S-New Caledonia)     |
| <i>Herengeria vasiformis</i>         | QMG318771    |                             | <b>LN624150</b>                     | Norfolk Ridge, Seamount (Pacific Ocean)              |
| <i>Herengeria</i> sp.                | WAM Z13629   |                             | <b>LN624151</b>                     | North West Cape (W-Australia)                        |
| <i>Herengeria</i> sp.                | WAM Z35669   | <b>LN624187</b>             |                                     | Jurien Bay (W-Australia)                             |
| <i>Herengeria</i> sp.                | WAM Z35673   | <b>LN624188</b>             |                                     | Kalbarri (W-Australia)                               |
| <i>Herengeria</i> sp.                | WAM Z35676   | <b>LN624189</b>             |                                     | Zuytdorp (W-Australia)                               |
| <i>Herengeria</i> sp.                | WAM Z35675   | <b>LN624190</b>             |                                     | Kalbarri (W-Australia)                               |
| <i>Isabella mirabilis</i>            | QMG318765    | <b>LN624214</b>             | <b>LN624152</b>                     | Norfolk Ridge, Seamount (Pacific Ocean)              |
| <i>Isabella mirabilis</i>            | QMG318803    | <b>LN624215</b>             | <b>LN624153</b>                     | Norfolk Ridge, Seamount (Pacific Ocean)              |
| <i>Isabella mirabilis</i>            | QMG318560    | <b>LN624213</b>             |                                     | Norfolk Ridge, Seamount (Pacific Ocean)              |
| <i>Isabella mirabilis</i>            | QMG318737    |                             | <b>LN624154</b>                     | Norfolk Ridge, Seamount (Pacific Ocean)              |
| <i>Neoschrammeniella castrum</i>     | QMG318586    | <b>LN624191</b>             | <b>LN624155</b>                     | Norfolk Ridge, Eponge Seamount (S-New Caledonia)     |
| <i>Neoschrammeniella norfolki</i> *  | QMG318555    |                             | <b>LN624156</b>                     | Norfolk Ridge, Introuvable Seamount (Pacific Ocean)  |
| <i>Neoschrammeniella norfolki</i>    | QMG317917    |                             | <b>LN624157</b>                     | Solomon Islands                                      |
| <i>Neophrissospongia</i> sp.         | WAM Z36053   |                             | <b>LN624158</b>                     | Adele (W-Australia)                                  |
| <i>Neophrissospongia</i> sp.         | WAM Z35946   |                             | <b>LN624159</b>                     | Imperieuse Reef (W-Australia)                        |
| <i>Neophrissospongia nolitangere</i> | MNHN DJV21   |                             | AF062602                            | La Ciotat (France, Mediterranean Sea)                |
| <b>Family Desmanthidae</b>           |              |                             |                                     |                                                      |
| <i>Desmanthus incrustans</i>         | QMG325782    | <b>LN624192</b>             |                                     | Gulf of Carpentaria (Queensland, Australia)          |
| <i>Petromica pacifica</i>            | QMG321706    | <b>LN624193</b>             |                                     | Eastern end, North West I (Queensland, Australia)    |
| <i>Petromica pacifica</i>            | QMG320001    | <b>LN624194</b>             |                                     | Keppel Island (Queensland, Australia)                |
| <i>Petromica</i> sp.                 | ZMA POR12543 | <b>LN624195</b>             |                                     | N of Bird Island, (W-Indian Ocean, Seychelles, Mahé) |
| <b>Family Isoraphiniidae</b>         |              |                             |                                     |                                                      |
| <i>Costifer</i> sp.                  | QMG319778    | <b>LN624196</b>             |                                     | Solomon Islands                                      |
| <b>Family Neopeltidae</b>            |              |                             |                                     |                                                      |
| <i>Callipelta</i> sp.                | WAM Z12392   | <b>LN624197</b>             |                                     | North West Cape (W-Australia)                        |
| <b>Family Macandrewiidae</b>         |              |                             |                                     |                                                      |
| <i>Macandrewia rigida</i>            | QMG317931    |                             | <b>LN624160</b>                     | Solomon Islands                                      |
| <b>Family Phymatellidae</b>          |              |                             |                                     |                                                      |
| <i>Neaulaxinia</i> sp.               | WAM Z35668   |                             | <b>LN624161</b>                     | Perth Canyon (W-Australia)                           |
| <i>Neaulaxinia</i> sp.               | WAM Z35611   |                             | <b>LN624162</b>                     | Two Rocks (W-Australia)                              |
| <i>Neaulaxinia</i> sp.               | QMG326439    | <b>LN624198</b>             |                                     | Cascade Seamount (Tasmania, Australia)               |

Table 2. Cont.

| Species                            | Voucher      | GB/ENA Accession Number CO1 | GB/ENA Accession Number 28S (C1–D2) | Location                                           |
|------------------------------------|--------------|-----------------------------|-------------------------------------|----------------------------------------------------|
| <i>Neoaaulaxinia</i> sp.           | QMG326468    | LN624199                    |                                     | Cascade Seamount (Tasmania, Australia)             |
| <i>Neoaaulaxinia</i> sp.           | QMG326478    | LN624200                    |                                     | Cascade Seamount (Tasmania, Australia)             |
| <i>Neoaaulaxinia</i> sp.           | QMG326176    | LN624201                    |                                     | Cascade Seamount, Huon-slope (Tasmania, Australia) |
| <i>Neoaaulaxinia</i> sp.           | QMG326476    | LN624202                    |                                     | Cascade Seamount (Tasmania, Australia)             |
| <i>Reidispongia coerulea</i>       | QMG318642    | LN624203                    | LN624163                            | Norfolk Ridge, Seamount (Pacific Ocean)            |
| <i>Reidispongia coerulea</i>       | QMG318600    |                             | LN624164                            | Norfolk Ridge, Eponge Seamount (S-New Caledonia)   |
| <i>Reidispongia coerulea</i>       | QMG318563    | LN624204                    |                                     | Norfolk Ridge, Eponge Seamount (S-New Caledonia)   |
| <b>Family Pleromidae</b>           |              |                             |                                     |                                                    |
| <i>Anaderma rancureli</i>          | QMG318561    | LN624205                    | LN624165                            | Norfolk Ridge, Bank No1 Seamount (Pacific Ocean)   |
| <i>Anaderma rancureli</i>          | QMG318821    |                             | LN624166                            | Norfolk Ridge, Seamount (Pacific Ocean)            |
| <i>Anaderma rancureli</i>          | QMG318725    |                             | LN624167                            | Norfolk Ridge, Seamount (Pacific Ocean)            |
| <i>Anaderma rancureli</i>          | QMG318832    |                             | LN624168                            | Norfolk Ridge, Seamount (Pacific Ocean)            |
| <i>Pleroma menoui</i>              | QMG316523    |                             | LN624169                            | Norfolk Ridge, Seamount (Pacific Ocean)            |
| <i>Pleroma menoui</i>              | QMG317900    | LN624206                    | LN624170                            | Solomon Islands                                    |
| <i>Pleroma menoui</i>              | QMG316513    | LN624207                    | LN624171                            | W-Norfolk Ridge, Seamount (Pacific Ocean)          |
| <i>Pleroma</i> sp.                 | WAM Z35947   |                             | LN624172                            | Imperieuse Reef, (W-Australia)                     |
| <b>Family Scleritodermidae</b>     |              |                             |                                     |                                                    |
| <i>Aciculites orientalis</i>       | QMG318638    |                             | LN624173                            | Norfolk Ridge, Seamount (Pacific Ocean)            |
| <i>Microscleroderma herdmani</i>   | QMG316621    |                             | LN624174                            | Lord Howe Rise, Seamount (Pacific Ocean)           |
| <i>Microscleroderma</i> sp.        | GW2935       |                             | LN624175                            | Ekamako cave, Nuku Hiva (Marquesas Island)         |
| <i>Microscleroderma</i> sp.        | GW2936       |                             | LN624176                            | Ekamako cave, Nuku Hiva (Marquesas Island)         |
| <i>Microscleroderma</i> sp.        | GW2933       |                             | LN624177                            | Tepari cave, Tahiti Iti (Windward, Society Island) |
| <i>Scleritoderma camusi</i>        | QMG317903    |                             | LN624178                            | Solomon Islands                                    |
| <i>Scleritoderma flabelliforme</i> | QMG318641    |                             | LN624179                            | Norfolk Ridge, Seamount (Pacific Ocean)            |
| <i>Scleritoderma flabelliforme</i> | QMG318658    |                             | LN624180                            | Norfolk Ridge, Seamount (Pacific Ocean)            |
| <i>Scleritoderma flabelliforme</i> | QMG318664    |                             | LN624181                            | Norfolk Ridge, Seamount (Pacific Ocean)            |
| <b>Family Siphonidiidae</b>        |              |                             |                                     |                                                    |
| <i>Siphonidium</i> sp.             | WAM Z36104   |                             | LN624182                            | Broome (W-Australia)                               |
| <b>Family Theonellidae</b>         |              |                             |                                     |                                                    |
| <i>Discodermia polymorpha</i>      |              |                             | AF062603                            | La Ciotat (France, Mediterranean Sea)              |
| <i>Discodermia polymorpha</i>      | ZMBN 85237   | HM592686                    | HM592819                            | La Ciotat (France, Mediterranean Sea)              |
| <i>Discodermia proliferans</i>     | G318639      |                             | LN624183                            | Norfolk Ridge, Seamount (Pacific Ocean)            |
| <i>Theonella conica</i>            | UCMPWC1025   |                             | HM592818                            | Near Selapiu Island (Papua New Guinea)             |
| <i>Theonella mirabilis</i>         | ZMA POR16788 | LN624208                    | LN624184                            | N-Cape-Hedo (W-Pacific, Japan, Okinawa)            |
| <i>Theonella swinhoei</i>          | ZMA POR16637 | HM592745                    | HM592820                            | Hurghada (Egypt)                                   |
| <i>Theonella</i> sp.               | WAM Z35071   | LN624209                    | LN624185                            | Point Cloates (W-Australia)                        |
| <i>Theonella</i> sp.               | WAM Z35945   |                             | LN624186                            | Imperieuse Reef (W-Australia)                      |
| <i>Theonella</i> sp.               | WAM Z37115   | LN624210                    |                                     | Dampier Peninsula (W-Australia)                    |
| <b>Family Phymaraphiniidae</b>     |              |                             |                                     |                                                    |

Table 2. Cont.

| Species                            | Voucher       | GB/ENA Accession Number CO1 | GB/ENA Accession Number 28S (C1–D2) | Location                                      |
|------------------------------------|---------------|-----------------------------|-------------------------------------|-----------------------------------------------|
| <i>Exsuperantia clava</i>          | ZMA POR 21668 | HM592730                    | HM592830                            | Seamounts south of Azores                     |
| <b>Family Vetulinidae</b>          |               |                             |                                     |                                               |
| <i>Vetulina</i> sp.                | WAM Z35842    | <b>LN624211</b>             |                                     | Ashmore Reef (W-Australia)                    |
| <i>Vetulina</i> sp.                | WAM Z36103    | <b>LN624212</b>             |                                     | Broome (W-Australia)                          |
| <b>Family Geodiidae</b>            |               |                             |                                     |                                               |
| <b>Subfamily Geodinae</b>          |               |                             |                                     |                                               |
| <i>Geodia gibberosa</i>            | ZMBN 77928    | EU442209                    | FJ717708                            | Bocas del Toro (Panama, Atlantic)             |
| <i>Geodia vosmaeri</i>             | ZMBN 85213    | HM592722                    | HM592817                            | Key Largo, Florida keys, FL (U.S.A.)          |
| <i>Geodia cydonium</i>             | ZMA POR21652  | HM592738                    | HM592806                            | Berlengas (Portugal)                          |
| <i>Geodia macandrewii</i>          | ZMBN 77924    | EU442198                    | EU552082                            | Korsfjord (Western Norway)                    |
| <i>Geodia baretti</i>              | ZMBN 77922    | EU442194                    | EU552080                            | Korsfjord (Western Norway)                    |
| <i>Geodia baretti</i>              | ZMBN 85202    | HM592720                    | HM592809                            | Hebrides Islands (Scotland)                   |
| <i>Geodia megastrella</i>          | ZMA POR21654  | HM592731                    |                                     | Seamounts south of Azores                     |
| <b>Subfamily Erylinae</b>          |               |                             |                                     |                                               |
| <i>Pachymatisma johnstonia</i>     | MNHN DCL4015  |                             | AF062601                            | Roscoff (France)                              |
| <i>Pachymatisma johnstonia</i>     | ZMA POR21442  | EF564338                    | HM592832                            | Berlengas Islands (Portugal)                  |
| <i>Pachymatisma johnstonia</i>     | ZMA POR20348a | EF564330                    |                                     | Minggulay reef (Scotland)                     |
| <i>Erylus discophorus</i>          | ZMA POR21716  | HM592692                    | HM592822                            | Piran (Slovenia)                              |
| <i>Erylus granularis</i>           | ZMA POR21656  | HM592729                    | HM592827                            | Seamounts south of Azores                     |
| <i>Erylus topsenti</i>             | ZMA POR21657  | HM592733                    | HM592831                            | Seamounts south of Azores                     |
| <b>Family Ancorinidae</b>          |               |                             |                                     |                                               |
| <i>Ancorina</i> sp.                | ZMA POR21660  | HM592744                    | HM592785                            | Gorrige Bank                                  |
| <i>Ecionemia megastylifera</i>     | ZMBN 81782    | FJ711642                    | FJ711648                            | Bocas del Toro (Panama, Caribbean)            |
| <i>Ecionemia robusta</i>           | S1018         | HM592724                    | HM592802                            | Investigator group Island (South Australia)   |
| <i>Rhabdastrella cordata</i>       | S1026         | HM592727                    | HM592813                            | Investigator group Island (South Australia)   |
| <i>Stelletta tuberosa</i>          | ZMA POR21665  | HM592735                    | HM592799                            | Seamounts south of Azores                     |
| <i>Stelletta lactea</i>            | Mc4945        | HM592752                    | HM592795                            | Strangford Lough (Northern Ireland)           |
| <i>Stelletta clarella</i>          | ZMA POR21673  | HM592736                    | HM592797                            | Monterey Bay, CA (U.S.A.)                     |
| <b>Family Calthropellidae</b>      |               |                             |                                     |                                               |
| <i>Calthropella geodioides</i>     | ZMA POR21667  | HM592734                    | HM592825                            | Seamounts south of Azores                     |
| <i>Calthropella geodioides</i>     | MNHN DCL4076  | HM592705                    | HM592826                            | Off Cape S. Maria di Leuca (Southern Italy)   |
| <b>Family Pachastrellidae</b>      |               |                             |                                     |                                               |
| <i>Characella pachastrelloides</i> | ZMA POR20375  | HM592749                    | HM592781                            | Mingulay Reef, Scotland (United Kingdom)      |
| <i>Pachastrella nodulosa</i>       | ZMBN 85227    | HM592698                    | HM592775                            | Korsfjord (Western Norway)                    |
| <i>Poecillastra compressa</i>      | MNHN DCL4072  | HM592714                    | AF062599                            | Banc de l'Esquine (France, Mediterranean Sea) |
| <i>Thenea abyssorum</i>            | ZMBN 85228    | HM592712                    | HM592770                            | Greenland Sea                                 |
| <i>Thenea levis</i>                | ZMBN 85230    | HM592717                    | HM592765                            | Off Korsfjord (Western Norway)                |
| <i>Thenea schmidtii</i>            | ZMA POR18036  | HM592737                    |                                     | Gulf of Cadiz                                 |
| <i>Triptolemma intextum</i>        | MNHN DCL4080  | HM592710                    | HM592777                            | Off Cape S. Maria di Leuca (Southern Italy)   |
| <i>Vulcanella aberrans</i>         | ZMBN 80959    | HM592699                    | HM592758                            | Sotbakken (Northern Norway)                   |
| <i>Vulcanella gracilis</i>         | MNHN DCL4082  | HM592704                    | HM592760                            | Off Cape S. Maria di Leuca (Southern Italy)   |
| <b>Family Alecetonidae</b>         |               |                             |                                     |                                               |

Table 2. Cont.

| Species                                  | Voucher           | GB/ENA Accession Number CO1 | GB/ENA Accession Number 28S (C1–D2) | Location                    |
|------------------------------------------|-------------------|-----------------------------|-------------------------------------|-----------------------------|
| <i>Alectona millari</i>                  | ZMBN 85238        | HM592670                    |                                     | Sotbakken (Northern Norway) |
| <b>Family Tetillidae</b>                 |                   |                             |                                     |                             |
| <i>Cinachyrella alloclada</i>            | DH S271=TAU25617  |                             | JX177935                            |                             |
| <i>Cinachyrella apion</i>                | ZMBN 81789        | HM592667                    | HM592753                            | Key Largo, FL (U.S.A.)      |
| <i>Cinachyrella kuekenthali</i>          |                   | EF519603                    |                                     |                             |
| <i>Cinachyrella schulzei</i>             | G320636           | HM032745                    |                                     |                             |
| <i>Cinachyrella levantinensis</i>        | DH S124=TAU 25618 |                             | JX177938                            |                             |
| <i>Cinachyrella levantinensis</i>        | TAU 25529         |                             | JX177939                            |                             |
| <i>Cinachyrella levantinensis</i>        | MHNM 16194        |                             | JX177941                            |                             |
| <i>Cinachyrella barbata</i>              | NIWA 28877        |                             | JX177950                            |                             |
| <i>Cinachyrella antarctica</i>           | NIWA28957         |                             | JX177949                            |                             |
| <i>Craniella</i> cf. <i>leptoderma</i>   | G315031           |                             | JX177942                            |                             |
| <i>Craniella</i> cf. <i>leptoderma</i>   | NIWA 36097        |                             | JX177944                            |                             |
| <i>Craniella</i> cf. <i>leptoderma</i>   | NIWA 28524        |                             | JX177945                            |                             |
| <i>Craniella</i> cf. <i>leptoderma</i>   | NIWA 28496        |                             | JX177946                            |                             |
| <i>Craniella</i> cf. <i>leptoderma</i>   | NIWA 28507        |                             | JX177943                            |                             |
| <i>Craniella cranium</i>                 | ZMBN 85239        | HM592669                    |                                     | Korsfjord (Western Norway)  |
| <i>Craniella zetlandica</i>              |                   | HM032751                    |                                     |                             |
| <i>Craniella</i> sp.                     | ZMBN 85240        | HM592668                    |                                     | Korsfjord (Western Norway)  |
| <i>Fangophilina</i> sp.                  | NIWA 28614        |                             | JX177952                            |                             |
| <i>Fangophilina</i> sp.                  | NIWA 28586        |                             | JX177953                            |                             |
| <i>Paratetilla bacca</i>                 | G306342           |                             | JX177927                            |                             |
| <i>Amphitethya</i> cf. <i>microsigma</i> | SAM S1189         |                             | JX177929                            |                             |
| <b>Family Agelasidae</b>                 |                   |                             |                                     |                             |
| <i>Astrosclella willeyana</i>            | UCMPWC 1070       | AY561969                    |                                     |                             |
| <i>Agelas dispar</i>                     |                   | EF519546                    |                                     |                             |
| <i>Axinella corrugate</i>                |                   | NC006894                    |                                     |                             |
| <i>Prosuberites laughlini</i>            | UCMPWC 875        | AY561960                    |                                     | Caribbean                   |
| <b>Family Dictyonellidae</b>             |                   |                             |                                     |                             |
| <i>Dictyonella</i> sp.                   |                   | AM498649                    |                                     |                             |
| <i>Acanthella acuta</i>                  | Mc7160            | HQ379408                    |                                     | Mediterranean               |
| <i>Phakellia ventilabrum</i>             | Mc4248            | HQ379409                    |                                     | Scotland                    |
| <b>Family Spongillidae</b>               |                   |                             |                                     |                             |
| <i>Baikalospongia bacillifera</i>        |                   | EU000570                    |                                     |                             |
| <i>Ephydatia fluviatilis</i>             | ZMB Por12658      | DQ167174                    |                                     |                             |
| <i>Lubomirskia baicalensis</i>           | ZMB Por12654      | DQ167169                    |                                     |                             |
| <i>Eunapius fragilis</i>                 |                   | AJ843882                    |                                     |                             |
| <i>Spongilla lacustris</i>               |                   | AJ843883                    |                                     |                             |
| <i>Spongilla lacustris</i>               |                   | EU000572                    |                                     |                             |
| <i>Pachydictyum globosum</i>             | ZMB Por12649      | DQ167177                    |                                     |                             |

Table 2. Cont.

| Species                                         | Voucher   | GB/ENA Accession Number CO1 | GB/ENA Accession Number 28S (C1–D2) | Location        |
|-------------------------------------------------|-----------|-----------------------------|-------------------------------------|-----------------|
| <b>Family Tethyidae/Hemiasterellidae</b>        |           |                             |                                     |                 |
| <i>Tethya aurantium</i>                         |           | EF584565                    |                                     | Mediterranean   |
| <i>Tethya citrina</i>                           | Mc5113    | HQ379427                    |                                     | Wales           |
| <i>Adreus fascicularis</i>                      | Mc4559    | HQ379428                    |                                     | English Channel |
| <b>Family Clionidae</b>                         |           |                             |                                     |                 |
| <i>Pione vastifica</i>                          |           | EF519665                    |                                     |                 |
| <i>Cliona celata</i>                            |           | EF519608                    |                                     |                 |
| <b>Family Polymastiidae</b>                     |           |                             |                                     |                 |
| <i>Polymastia janeirensis</i>                   |           | EU076813                    |                                     | Brazil          |
| <i>Sphaerotylus</i> sp.                         | Mc4236    | HQ379425                    |                                     | Ireland         |
| <b>Family Desmacellidae</b>                     |           |                             |                                     |                 |
| <i>Biemna fistulosa</i>                         | TAU 25197 | AM076982                    |                                     |                 |
| <i>Neofibularia nolitangere</i>                 |           | EF519653                    |                                     | Caribbean       |
| <b>Family Scopalinidae</b>                      |           |                             |                                     |                 |
| <i>Svenzea zeai</i>                             |           | EF519682                    |                                     | Caribbean       |
| <i>Scopalina lophyropoda</i>                    | Mc4217    | HQ379411                    |                                     | Mediterranean   |
| <b>Family Poecilosclerida</b>                   |           |                             |                                     |                 |
| <i>Crambe crambe</i>                            |           | AF526297                    |                                     |                 |
| <i>Crambe crambe</i>                            |           | AF526298                    |                                     |                 |
| <i>Monanchora arbuscula</i>                     |           | EF519645                    |                                     |                 |
| <i>Clathrina oxeota</i>                         |           | EF519605                    |                                     |                 |
| <i>Acantheurypon pilosella</i>                  | Mc7607    | JF440337                    |                                     | Ireland         |
| <i>Crella elegans</i>                           |           | JF440338                    |                                     | Mediterranean   |
| <i>Neopodospongia</i> sp.                       |           | JF440339                    |                                     | Ireland         |
| <i>Mycale laxissima</i>                         |           | EF519649                    |                                     | Caribbean       |
| <i>Tedania ignis</i>                            |           | DQ133896                    |                                     | Panama          |
| <b>Family Suberitidae &amp; Halichondriidae</b> |           |                             |                                     |                 |
| <i>Protosuberites</i> sp.                       | POR14649  | AY561979                    |                                     |                 |
| <i>Hymeniacion heliophila</i>                   |           | EU076812                    |                                     | Brazil          |
| <i>Suberites ficus</i>                          |           | AJ843891                    |                                     |                 |
| <i>Suberites domuncula</i>                      |           | AM690374                    |                                     | Adriatic Sea    |
| <i>Halichondria melanodocia</i>                 |           | EF519617                    |                                     | Caribbean       |
| <i>Topsentia ophiraphidites</i>                 |           | EU237482                    |                                     |                 |
| <b>Family Raspailiidae</b>                      |           |                             |                                     |                 |
| <i>Raspailia ramose</i>                         | Mc4024    | HQ379417                    |                                     | Ireland         |
| <i>Raspailia hispida</i>                        | Mc3597    | HQ379416                    |                                     | Ireland         |
| <i>Pandaros acanthifolium</i>                   |           | EF519662                    |                                     | Caribbean       |
| <i>Raspaciona aculeata</i>                      | Mc7159    | HQ379415                    |                                     | Mediterranean   |
| <i>Eurypon clavigerum</i>                       | Mc4992    | HQ379413                    |                                     | Ireland         |
| <i>Ectyoplasia ferox</i>                        |           | EF519612                    |                                     | Caribbean       |
| <i>Endectyon delaubenfelsi</i>                  | Mc4527    | HQ379412                    |                                     | English Channel |

Table 2. Cont.

| Species                           | Voucher | GB/ENA Accession Number CO1 | GB/ENA Accession Number 28S (C1–D2) | Location |
|-----------------------------------|---------|-----------------------------|-------------------------------------|----------|
| <i>Tethyspira spinosa</i>         | Mc4641  | HQ379418                    |                                     | Ireland  |
| <b>Family Stelligeridae</b>       |         |                             |                                     |          |
| <i>Stelligera rigida</i>          | Mc4357  | HQ379420                    |                                     | Scotland |
| <i>Stelligera stuposa</i>         | Mc4330  | HQ379421                    |                                     | Scotland |
| <i>Paratimea constellata</i>      | Mc4323  | HQ379419                    |                                     | Scotland |
| <i>Halicnemia patera</i>          | Mc5427  | HQ379422                    |                                     | Ireland  |
| <i>Halicnemia verticillata</i>    | Mc5018  | HQ379414                    |                                     | Ireland  |
| <b>Family Axinellidae</b>         |         |                             |                                     |          |
| <i>Dragmacidon reticulatum</i>    |         | AJ843894                    |                                     |          |
| <i>Axinella infundibuliformis</i> | Mc4438  | HQ379410                    |                                     | Scotland |
| <b>Outgroups</b>                  |         |                             |                                     |          |
| <i>Aplysina aerophoba</i>         |         | EF043371                    |                                     |          |
| <i>Hexadella pruvoti</i>          |         | FN667709                    |                                     |          |
| <i>Pleraplysilla</i> sp.          |         | EF519667                    |                                     |          |
| <i>Verongula rigida</i>           |         | EF519695                    |                                     |          |
| <i>Axinella damicornis</i>        |         |                             | AF062605                            |          |
| <i>Halichondria panicea</i>       |         |                             | AF062607                            |          |

New sequences from this study are highlighted in bold.

\*Fragment of holotype.

Abbreviations:

ZMA POR: Zoölogisch Museum van de Universiteit van Amsterdam.

QMG: Queensland Museum, Brisbane, Australia.

WAM: West Australian Museum.

ZMB Por: Museum for Natural History Humboldt Universität.

Mc: National Museums, Northern Ireland, Holywood.

UCMPW: University of California Museum of Paleontology, Berkeley, CA.

GW: Molecular Paleo- & Geobiology Munich, Germany.

ZMBN: Zoologisk Museum Bergen.

S/SAM: South Australian Museum, Adelaide.

MNHN: Muséum National d'Histoire Naturelle, Paris.

TAU: Steinhardt National Collection of Natural History, Zoological Museum at Tel Aviv University, Israel.

DH: Lab collections of Amir Szitenberg, Department of Zoology, Israel.

NIWA: National Institute of Water and Atmospheric Research, New Zealand.

doi:10.1371/journal.pone.0116038.t002

seconds; 72°C, 1 minute) × 35 cycles; 72°C, 5 minutes. PCR products were cleaned for sequencing using a standard ammonium acetate-ethanol precipitation [57]. Sequencing reactions of both strands with the same primers were carried out using BigDye Terminator v3.1 (Applied Biosystems, Forster City, CA, USA) and analyzed on an ABI 3730 Genetic Analyzer at the Sequencing Service of the Department of Biology, LMU München. The raw trace files were post-processed by base-calling, trimming and contig assembly in CodonCode Aligner v.3.7.1.1 (CodonCode Corporation) and subsequently checked by eye. The sponge origin of the sequences was evaluated by BLAST searches against NCBI GenBank (<http://blast.ncbi.nlm.nih.gov>).



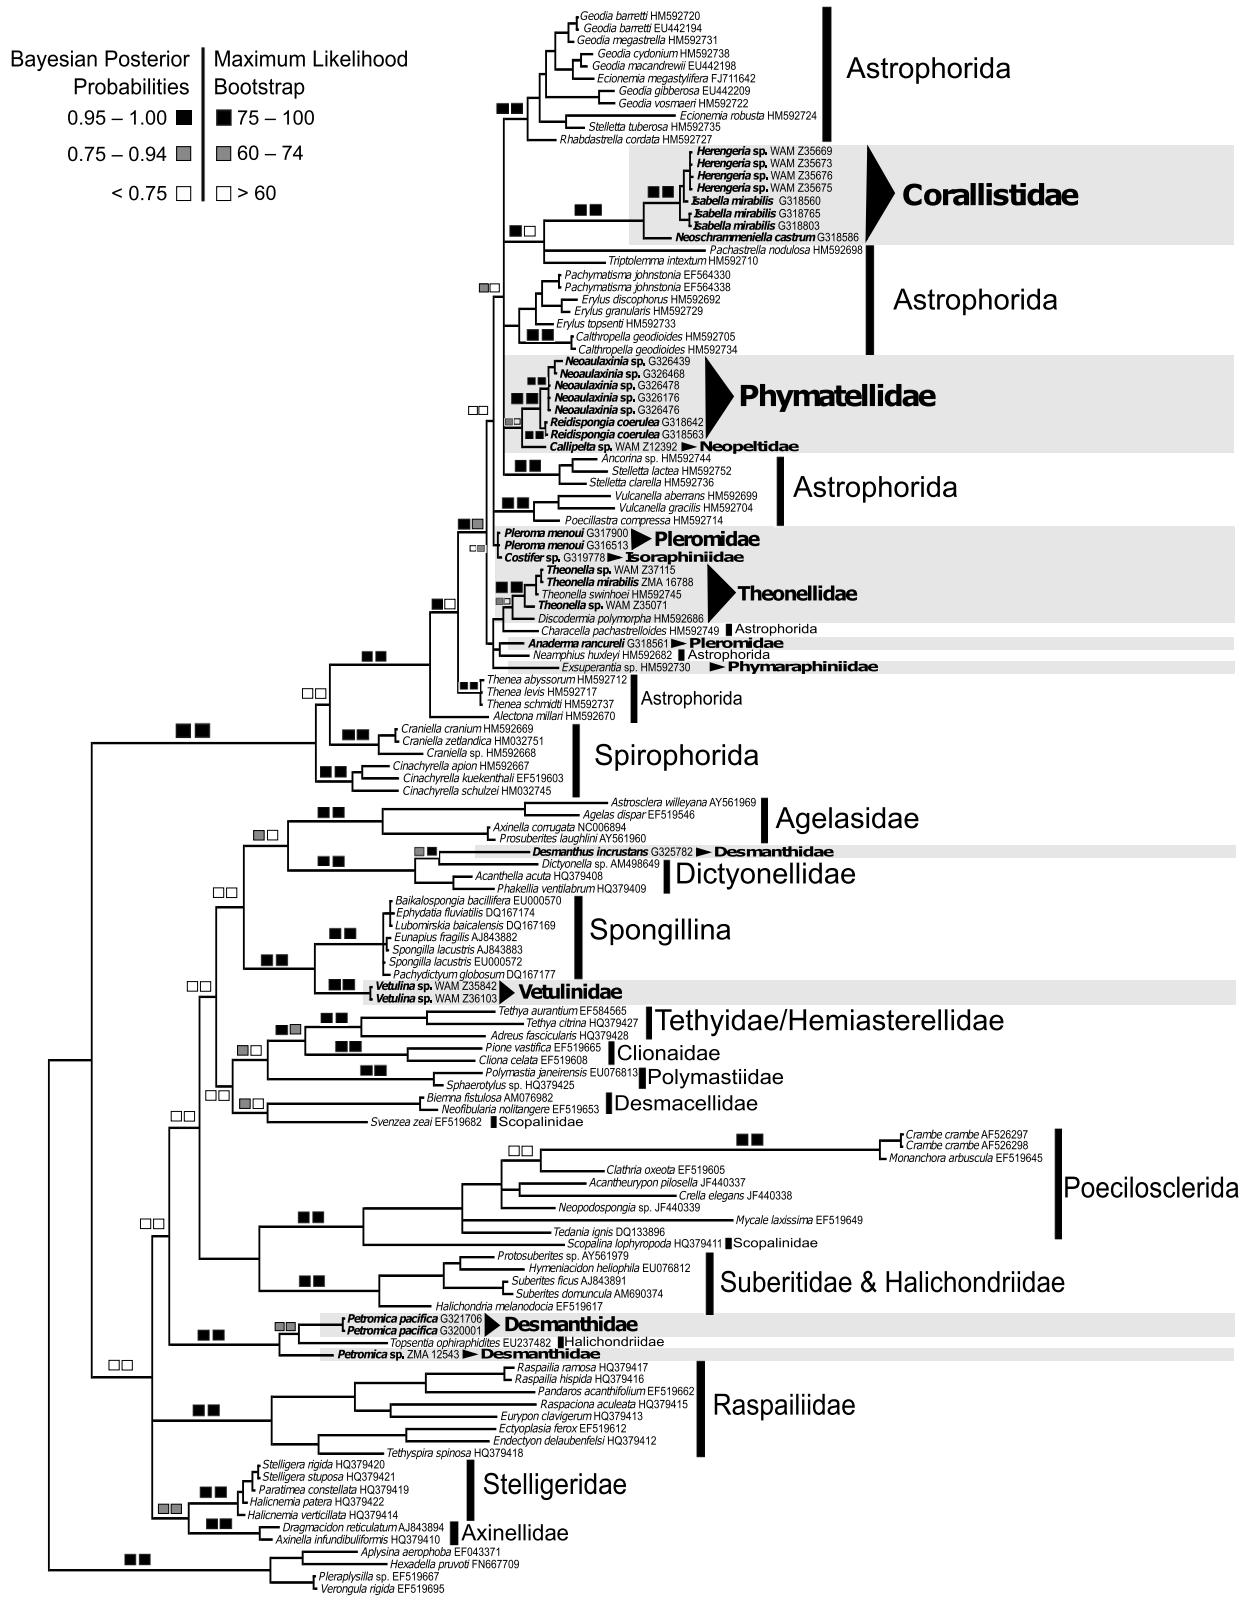

**Fig. 5. Bayesian Inference (MrBayes, GTR+I+G model) phylogeny of a representative selection of demosponge taxa based on CO1.** The maximum likelihood (RAxML) tree is congruent. Squares represent node supports. Black squares: PP=0.95–1.00, BP=75–100. Dark gray squares: PP=0.75–0.94, BP=60–74. White squares: PP<0.75, BP<60. Black triangle indicates lithistid families. Numbers behind taxon names are either voucher numbers or GenBank accession numbers. Self-generated sequences are in bold.

doi:10.1371/journal.pone.0116038.g005

## Phylogenetic reconstruction

### Sequence alignments and outgroup choice

Newly generated sequences as well as downloaded GenBank sequences of the CO1 and 28S gene were separately aligned with Muscle (v.3.6) [58] as incorporated in SeaView [59]. Alignments were subsequently controlled by eye. Saturation of both markers (CO1 and 28S) was evaluated using Xia's test [60] as implemented in DAMBE v5.1.5 [61]. This entropy-based index estimates a substitution saturation index (Iss) and compares it to a critical substitution saturation index (Iss.c). As both datasets (CO1 and 28S) were too different from each other with respect to taxon sampling and sequencing success of the CO1 gene region to be merged, analyses were done separately for each gene region. As 'Lithistida' is a polyphyletic group, a wide range of sequences from GenBank from Heteroscleromorpha families were added to the CO1 dataset to yield a representative adequate taxon set from the latest classification of Demospongiae according to Morrow et al. (2012) [49]. For the CO1 dataset, sequences of the subclasses Verongimorpha and Keratosa were chosen as outgroups, as these subclasses have shown shorter branch lengths than Haplosclerida, the sister group of Heteroscleromorpha [62]. *Axinella damicornis* and *Halichondria panicea* were chosen as outgroups for our 28S rDNA (C1–D2 partition). The alignments used in this study, as well as the morphological data matrix (see below) in Nexus format, are freely available at OpenDataLMU (<http://dx.doi.org/10.5282/ubm/data.66>).

### Phylogenetic analyses

For Bayesian phylogenetic analyses we used the parallel version of MrBayes v.3.1.2 [63] on a Linux cluster under the most general GTR+G+I model, as possible overparameterization does not appear to have a negative effect on the results [64]. Analyses were run in two concurrent runs of four Metropolis-coupled Markov-chains (MCMC) for 100,000,000 generations or stopped when the average standard deviation of split frequencies decreased below 0.01. The first 25% of the sampled trees were discarded for further analysis as burn-in. In both datasets, Maximum Likelihood (ML) bootstrap analyses (1,000 replicates) were also performed under the GTRGAMMAI nucleotide evolution model using raxmlGUI v.1.3 [65]. Tree topologies from Bayesian and ML analyses were compared and visualized using TreeGraph2 [66].

## Morphological Analyses

In order to investigate spicule evolution of megascleres and microscleres within the Astrophorida/lithistids we used Mesquite v2.75 [67]. We designed a new

**Table 3.** Summary of taxonomic changes from our present study and previous studies.

| Lithistid taxa                  | Gene Region                      | Reallocation                       | References                              |
|---------------------------------|----------------------------------|------------------------------------|-----------------------------------------|
| <b>Azoricidae</b>               |                                  |                                    |                                         |
| <i>Leiodermatium</i>            | 18S                              | Tetractinellida                    | [14]*                                   |
| <b>Corallistidae</b>            |                                  |                                    |                                         |
| <i>Corallistes</i>              | 18S, 28S, CO1, ITS               | Astrophorida                       | [39, 45, 46]                            |
| <b><i>Neophrissospongia</i></b> | 18S, <b>28S</b> , CO1            | <b>Astrophorida</b>                | [36, 39], <b>PS</b>                     |
| <b><i>Herengeria</i></b>        | <b>28S</b> , CO1                 | <b>Astrophorida</b>                | <b>PS</b>                               |
| <b><i>Neoschrammeniella</i></b> | <b>28S</b> , CO1                 | <b>Astrophorida</b>                | <b>PS</b>                               |
| <b><i>Isabella</i></b>          | <b>28S</b> , CO1                 |                                    | <b>PS</b>                               |
| <b>Desmanthidae</b>             |                                  |                                    |                                         |
| <i>Desmanthus</i>               | 28S, 18S, <b>CO1</b>             | <b>Dictyonellidae</b>              | [39, 49], <b>PS</b>                     |
| <i>Petromica</i>                | 18S, <b>CO1</b>                  | <b>Halichondriidae</b>             | [14, 39], <b>PS</b>                     |
| <b>Isoraphiniidae</b>           |                                  |                                    |                                         |
| <b><i>Costifer</i></b>          | <b>CO1</b>                       | <b>Astrophorida</b>                | <b>PS</b>                               |
| <b>Macandrewiidae</b>           |                                  |                                    |                                         |
| <b><i>Macandrewia</i></b>       | <b>28S</b>                       | <b>Astrophorida</b>                | <b>PS</b>                               |
| <b>Neopeltidae</b>              |                                  |                                    |                                         |
| <b><i>Callipelta</i></b>        | 28S, 18S, <b>CO1</b>             | <b>Astrophorida</b>                | [39, 50], <b>PS</b>                     |
| <i>Homophymia</i>               | 18S                              | Astrophorida                       | [39]                                    |
| <b>Phymaraphiniidae</b>         |                                  |                                    |                                         |
| <i>Exsuperantia</i>             | 28S, CO1, 18S                    | Astrophorida                       | [14, 36]                                |
| <b>Phymatellidae</b>            |                                  |                                    |                                         |
| <b><i>Neoaulaxinia</i></b>      | <b>28S</b> , CO1                 | <b>Astrophorida</b>                | <b>PS</b>                               |
| <b><i>Reidispongia</i></b>      | <b>28S</b> , CO1                 | <b>Astrophorida</b>                | <b>PS</b>                               |
| <b>Pleromidae</b>               |                                  |                                    |                                         |
| <b><i>Anaderma</i></b>          | <b>28S</b> , CO1                 | <b>Astrophorida</b>                | <b>PS</b>                               |
| <b><i>Pleroma</i></b>           | <b>28S</b> , CO1                 | <b>Astrophorida</b>                | <b>PS</b>                               |
| <b>Scleritodermidae</b>         |                                  |                                    |                                         |
| <b><i>Aciculites</i></b>        | 18S, <b>28S</b> , CO1            | <b>Tetractinellida</b>             | [39, 46, 48], <b>PS</b>                 |
| <b><i>Microscleroderma</i></b>  | 18S, <b>28S</b> , EF1alpha, ATPb | <b>Tetractinellida</b>             | [7, 39, 47], <b>PS</b>                  |
| <b><i>Scleritoderma</i></b>     | 18S, <b>28S</b>                  | <b>Tetractinellida</b>             | [14]*, <b>PS</b>                        |
| <b>Siphonidiidae</b>            |                                  |                                    |                                         |
| <b><i>Siphonidium</i></b>       | 18S, <b>28S</b>                  | Tetractinellida                    | [14]*, <b>PS</b>                        |
| <b>Theonellidae</b>             |                                  |                                    |                                         |
| <i>Discodermia</i>              | 18S, CO1, ITS2, <b>28S</b>       | <b>Astrophorida</b>                | [14, 36, 38, 39, 42, 45, 46], <b>PS</b> |
| <i>Manihinea</i>                | 18S                              | Astrophorida                       | [39]                                    |
| <b><i>Theonella</i></b>         | 18S, 28S, <b>CO1</b>             | <b>Astrophorida</b>                | [14, 36, 38, 39, 46, 48], <b>PS</b>     |
| <b>Vetuliniidae</b>             |                                  |                                    |                                         |
| <b><i>Vetulina</i></b>          | 18S, 28S, <b>CO1</b>             | <b>Sister-group to Spongillida</b> | [14, 38, 39, 45, 46], <b>PS</b>         |

Self-generated sequences, proposed reallocation from our data are marked in bold. PS for Present study.

doi:10.1371/journal.pone.0116038.t003

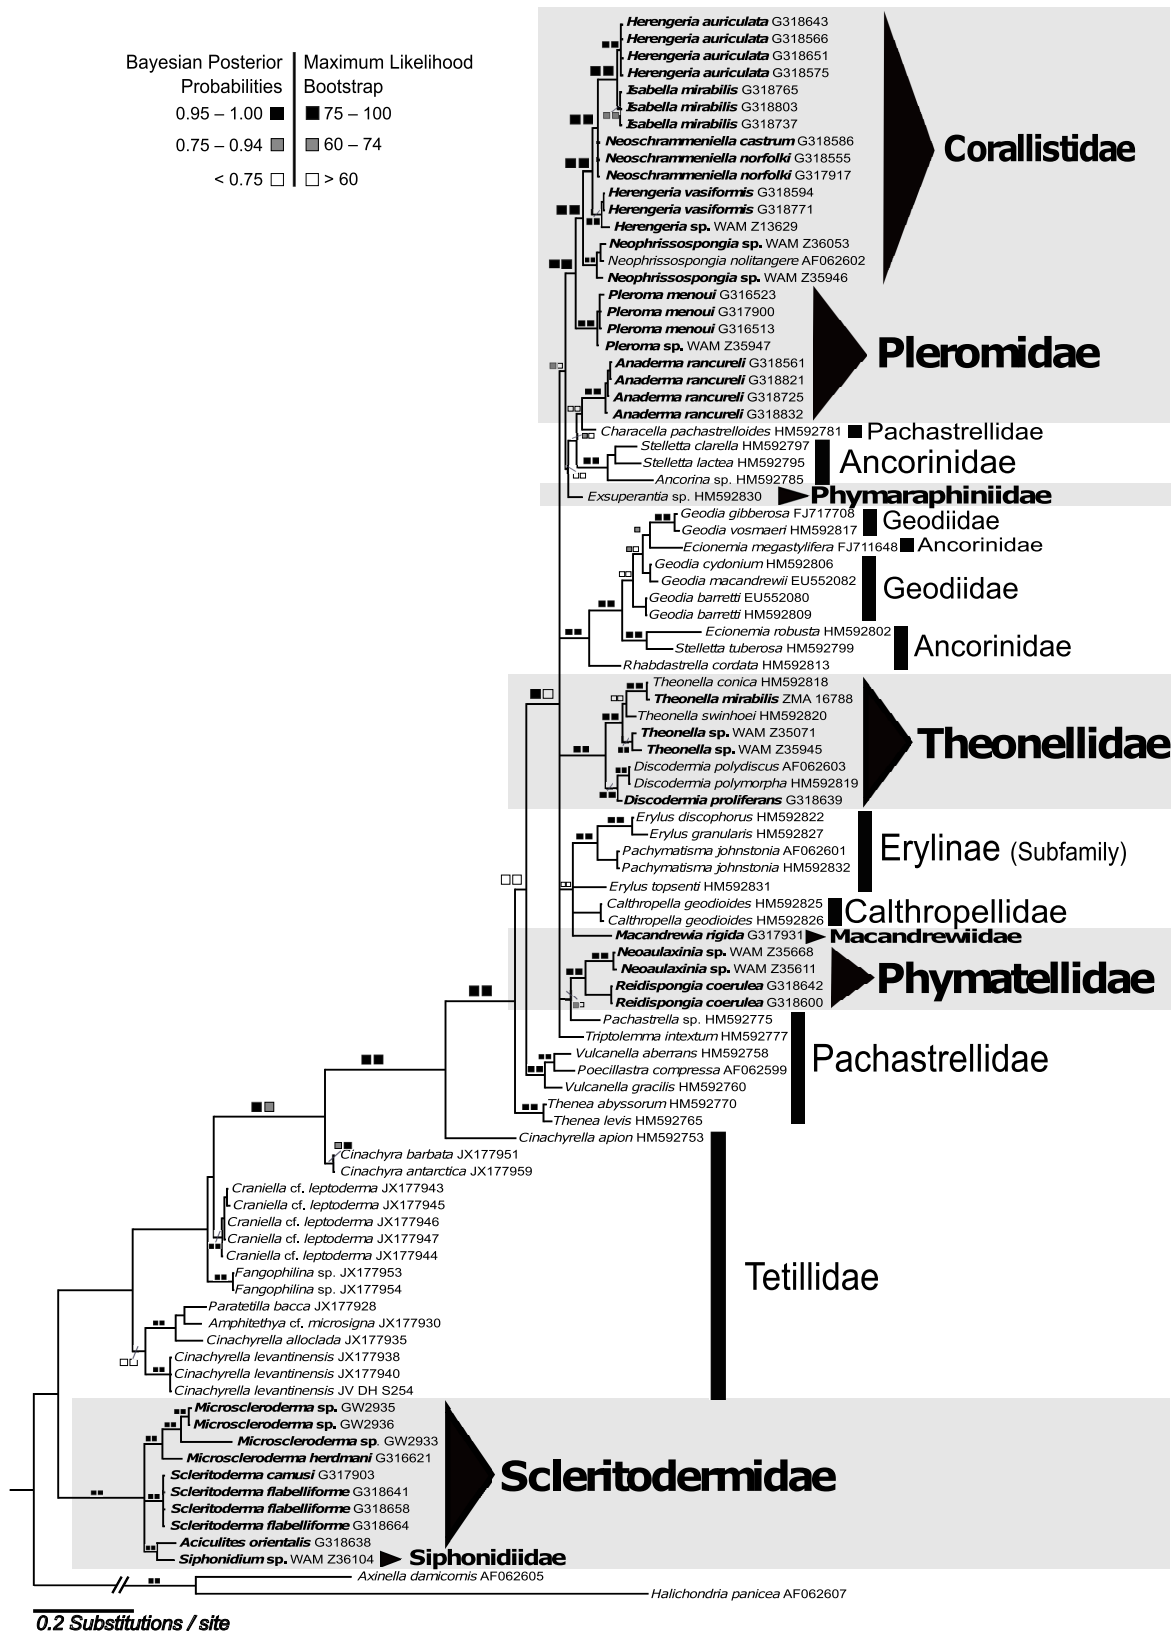

**Fig. 6. Bayesian Inference (MrBayes, GTR+I+G model) phylogeny of a representative selection of demosponge taxa based on 28S rDNA (partition C1–D2).** The maximum likelihood (RAxML) tree is congruent. Squares represent node supports. Black squares: PP=0.95–1.00, BP=75–100. Dark gray squares: PP=0.75–0.94, BP=60–74. White squares: PP<0.75, BP<60. Black triangle indicates lithistid families. Numbers behind taxon names are either voucher numbers or GenBank accession numbers. Self-generated sequences are in bold.

doi:10.1371/journal.pone.0116038.g006

character data matrix for lithistid sponges from our own observed data, and amended it with carefully selected data from another study (Cárdenas et al. 2011), representing the smaller part of the whole matrix. In total the final matrix consists of 69 taxa and 35 characters coded as 1 for present or 0 for absent (see [S1 Table](#) and [S1 File](#)). For tracing characters over the imported molecular Bayesian tree and testing the homoplasy within lithistids and astrophorids the parsimony ancestral state reconstruction method was used under the unordered state assumption.

## Results

### Comparison of both gene trees

Both molecular markers were not significantly saturated, as the Iss.c (0.801) was significantly higher than the observed Iss (0.286), therefore, both markers are suitable for conducting phylogenetic analyses with lithistid demosponges. The CO1 gene tree ([Fig. 5](#)) was used to resolve the classification of lithistids sequenced here with respect to other major demosponge groups. The resulting data matrix from the CO1 gene comprises 121 taxa. From 121 taxa, 31 are lithistids, from which 29 are represented by *de novo*-generated sequences and two (*Theonella swinhoei* and *Exsuperantia* sp.) obtained from GenBank. The 28S rDNA data matrix included 94 taxa, of which 48 are lithistids (43 *de novo*-generated sequences and five sequences from GenBank). An overview of sequencing success is given in [Table 3](#). Bayesian inference and Maximum Likelihood topologies are congruent in both analyses.

### Intra-family relationships of lithistid sponges in relation to other demosponges

Based on both CO1 ([Fig. 5](#)) and 28S rDNA ([Fig. 6](#)) gene trees, the families Corallistidae, Pleromidae, Theonellidae, Phymatellidae, Phymaraphiniidae, Neopeltidae and Isoraphiniidae are nested within the Astrophorida. Additionally, the family Macandrewiidae is supported by our 28S rDNA dataset to also belong to the Astrophorida, indicating that 8 out of 13 families belong to the Astrophorida. A strongly supported clade (bootstrap: 100%, posterior probability 1.0) as a result of our 28S rRNA analysis (no CO1 data have been obtained yet) containing the family Scleritodermidae represented by the three genera (*Microscleroderma*, *Scleritoderma* and *Aciculites*), as well as the family Siphonidiidae (*Siphonidium* sp.) are the sister group to Tetillidae/Astrophorida. The family Desmanthidae (genera *Desmanthus* and *Petromica*) is recovered as polyphyletic. The genus *Petromica* forms a highly supported clade (bootstrap of

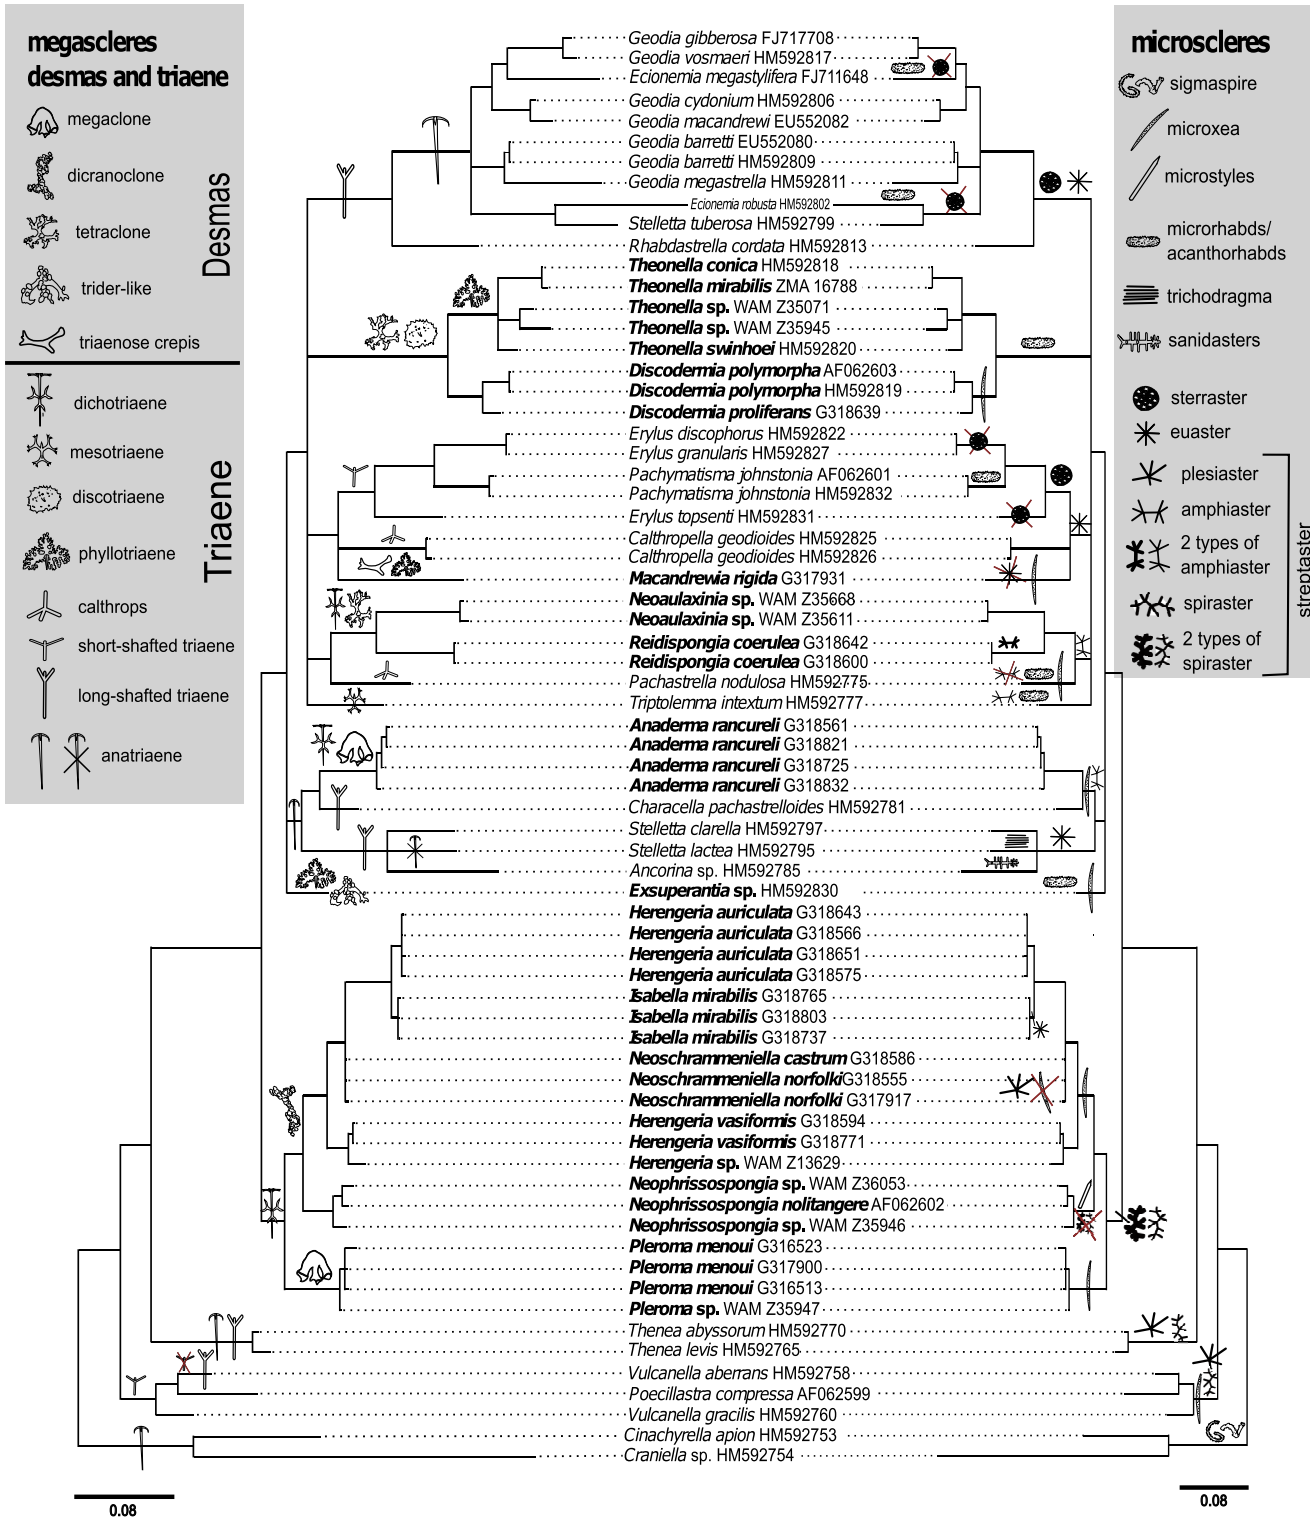

**Fig. 7. Parsimony ancestral state reconstruction of mega- and microscleres mapped on an imported modified molecular Bayesian Inference 28S rDNA (partition C1–D2) gene tree from Fig. 6 in Mesquite v.2.75.** The phylograms represent the presents or absents of megascleres (left) and microscleres (right). Numbers behind taxon names are either voucher numbers or GenBank accession numbers.

doi:10.1371/journal.pone.0116038.g007

99% and posterior probabilities 1.00) with the halichondriid *Topsentia ophiraphidites*. *Desmanthus incrustans* is sister to the single specimen of *Dictyonella* sp. (bootstrap: 84%, posterior probability: 0.75) of the family Dictyonellidae. This clade shows high bootstrap (99%) and posterior probability (1.00) support values. The monogeneric lithistid family Vetulinidae forms a highly supported clade with Spongillina (96% bootstrap and 1.00 posterior probability).

## Phylogenetic relationships of lithistid sponges within the Tetractinellidae

### Family Corallistidae

The family Corallistidae is monophyletic in both CO1 (Fig. 5) and 28S rDNA (Fig. 6) gene trees. The genus *Herengeria* is polyphyletic, *Isabella* is not monophyletic, and *Neophrissospongia* is monophyletic. All these clades are strongly supported. The 28S gene analysis does not resolve the genus *Neoschrammeniella* as monophyletic. However, both gene trees indicate a sister group relationship of *Neoschrammeniella castrum* and *Neoschrammeniella norfolki* to the *Herengeria/Isabella* clade, with high support values (bootstrap of 82% and posterior probabilities of 0.99). Species of *Herengeria auriculata* are sister to *Isabella mirabilis*, which is also highly supported in both CO1 and 28S rDNA gene trees. The genus *Neophrissospongia* represents a sister clade to the genera *Herengeria*, *Neoschrammeniella* and *Isabella*.

### Family Pleromidae

The family Pleromidae is polyphyletic and is represented by the genera *Pleroma* and *Anaderma*. The genus *Anaderma* seems to be related to *Characella pachastrelloides incertae sedis*, sensu Cárdenas et al. (2011, 2012) [36, 68], however this is not supported by posterior probabilities or bootstrap values. In contrast the genus *Pleroma* is recovered as the sister to the Corallistidae, with strong support (bootstrap of 84% and posterior probability of 1.00).

### Family Theonellidae

The family Theonellidae is monophyletic and contains the genera *Theonella* and *Discodermia*. Both genera are monophyletic and form a sister group to each other. All nodes are highly supported. The exact position within the Astrophorida however, remains unclear due to low resolution within the gene trees.

### Family Phymatellidae

Phymatellidae is monophyletic. *Neoaulaxinia* and *Reidispongia* are highly supported to be sister taxa in both gene trees. The CO1 gene tree shows a close relationship of Phymatellidae to the lithistid genus *Callipelta* (Neopeltidae), however this relationship is only moderately supported by a posterior probability of 0.78 and not supported with bootstrap. In contrast the 28S rDNA gene tree shows *Neoaulaxinia* and *Reidispongia* close to *Pachastrella* sp. from the family

Pachastrellidae. This finding has a posterior probability of 0.93 and not supported by bootstrap.

#### **Families Phymaraphiniidae, Macandrewiidae, Isoraphiniidae and Neopeltidae**

The species *Exsuperantia* sp. (family Phymaraphiniidae), *Macandrewia rigida* (family Macandrewiidae), *Costifer* sp. (family Isoraphiniidae) and *Callipelta* sp. (family Neopeltidae), only represented by a single taxon each, clearly group within the Astrophorida. However, the low resolution within both gene trees makes the inference of a clear relationship to other lithistid or astrophorid clades impossible.

#### **Family Scleritodermidae and Siphonidiidae**

The monophyly of Tetillidae as suggested by Szitzenberg et al. 2013 [69] could not be corroborated in any of our analyses, independently of whether the lithistid families Scleritodermidae and Siphonidiidae were included (28S rDNA gene tree) or not (CO1 gene tree). Scleritodermidae is monophyletic and is represented in the 28S rDNA gene tree with the genera *Microscleroderma*, *Scleritoderma* and *Aciculites*. The genera *Microscleroderma* and *Scleritoderma* are sister groups, while *Aciculites* (Scleritodermidae) group together with *Siphonidium* sp. (Siphonidiidae). All these nodes are highly supported.

#### **Parsimony reconstruction of ancestral states**

A summary of the parsimony reconstruction of possible ancestral states for megascleres and microscleres composed of homologous characters is given in Fig. 7. These were derived from precise morphological descriptions from the literature and new observations in this study. For some taxa, such as *Isabella mirabilis* and *Neoschrammeniella norfolki*, however, there could be difficulties interpreting whether character states of the various streptaster microscleres (spiraster/amphiaster/plesiaster) [51] were homologs or analogs. In this case we followed the definition of streptasters *sensu* Sollas (1888), where amphiasters bear some analogy to spirasters as they are only differentiated in the shaft, which could be either straight (=amphiaster, see Fig. 4G) or spiral (=spiraster see Fig. 4I,J). In addition, definitions of other streptasters, like plesiasters and metasters were used as described in the study of Cárdenas et al. 2012 [68]. This produced a total number of 13 megascleres (five different desmas and eight different triaenes) and 13 microscleres (Fig. 7). Our results show possible multiple convergences of megascleres and microscleres. These data indicate that megaclone desmas could have evolved two times independently in *Pleroma* and *Anaderma* and tetraclone desmas could have developed twice independently in the families Theonellidae and Phymatellidae. By comparison, dicranoclone desmas possibly evolved only once in the family Corallistidae, and desmas of triaenose crepis (*Exsuperantia* sp.) and trider-like desmas (*Macandrewia rigida*) also possibly developed only once. Dichotriaenes could have evolved three times independently in the families Phymatellidae and Corallistidae as well as in the genus *Anaderma*. Mesotriaenes (*Triptolemma intextum*) and discotriaenes (Theonellidae) probably only appeared



once. Phyllotriaenes could have evolved at least three times independently in the genus *Theonella*, *Macandrewia* and *Exsuperantia*. Anatriaenes may have evolved four times independently in different astrophorid and lithistid groups and were lost in some taxa (e.g. *Stelletta lactea*). Long and short-shafted triaenes were probably lost several times independently in many different astrophorid genera. Calthrops could have appeared at least twice independently according to this dataset (*Pachastrella nodulosa* and *Calthropella geodioides*). Our analysis also indicates a high potential of convergent spicule evolution and numerous secondary losses within most microscleres including amphiasters, spirasters, plesiasters, microxeas, euasters, sterrasters and microrhabds. This mapping indicates that secondary losses are four times more frequent in microscleres than in megascleres.

## Discussion

### Phylogeny of lithistids compared with previous molecular and morphological studies

From molecular phylogenetic analysis of 68 lithistid demosponges (the largest lithistid taxon sampling to date), our study has showed the complexity of spicule evolution within the polyphyletic 'order Lithistida'. Previously Burton (1929) and de Laubenfels (1936) had suggested the affiliation of triaene-bearing lithistids to the Astrophorida, subsequently affirmed by Lévi (1973) and accepted by Pisera & Lévi (2002) (see [Tab.1](#)). Similarly, previous data from different gene regions suggested that the four families Corallistidae, Neopeltidae, Phymaraphiniidae and Theonellidae, including the eight genera (*Corallistes*, *Neophrissospongia*, *Callipelta*, *Homophymia*, *Exsuperantia*, *Discodermia*, *Manihinea*, and *Theonella*) all belonged to the Astrophorida (for references see [Tab.1](#)). Our study corroborates all these findings and additionally provides evidence that *Herengeria*, *Isabella* and *Neoschrammeniella* (Corallistidae) should also be included in Astrophorida. Previously, the assignment of the four triaene-bearing lithistid families Isoraphiniidae, Macandrewiidae, Phymatellidae and Pleromidae to the Astrophorida was based only on morphological observations [[36](#), [39](#)], and is now confirmed based with molecular data. Molecular analyses undertaken in the present study corroborated these hypotheses for the first time, affirming the relationship of Pleromidae (*Pleroma*, *Anaderma*), Phymatellidae (*Neoaulaxinia*, *Reidispongia*), Isoraphiniidae (*Costifer*) and Macandrewiidae (*Macandrewia*) to the Astrophorida.

Based on spicule morphology Burton (1929) suggested a close relationship of the lithistid genera *Microscleroderma* and *Scleritoderma* (Scleritodermidae), both characterized by rhizoclone desmas, to the spirophorid family Tetillidae due to the possession of similar microscleres (sigmaspires). He also included the rhizoclone desma-bearing genus *Leiodermatium* (Azoricidae) in this group, which lacks sigmaspires. Later morphological observations by de Laubenfels (1936) assigned *Microscleroderma* to the Poecilosclerida. In *Systema Porifera* [[70](#), [71](#)], adopting a

conservative taxonomy approach, rhizomorine lithistids were divided into two families: Azoricidae (*Leiodermatium* and *Jereicopsis*) and Scleritodermidae (*Aciculites*, *Amphibleptula*, *Microscleroderma*, *Scleritoderma* and *Setidium*), based on the presence or absence of certain microscleres [70]. Previous molecular phylogenies had suggested a close relationship of the genera *Leiodermatium* (Azoricidae) [35], *Aciculites*, *Microscleroderma* and *Scleritoderma* (Scleritodermidae) [7, 14, 39, 46, 47, 72] to the Tetractinellida. However, the exact relationships to either Astrophorida or Spirophorida remained uncertain. Our 28S rDNA results revealed a highly supported monophyletic clade of Scleritodermidae+Siphonidiidae, which was also partly observed by Redmond et al. (2013) [39]. Conversely, the monophyly of Tetillidae [69] could not be confirmed from any of our analyses, independently of whether or not Scleritodermidae and/or Siphonidiidae were included. This result is also similar to the findings of Redmond et al. (2013) [39]. The clade Scleritodermidae+Siphonidiidae neither belongs to Astrophorida nor to spirrophorids, but instead it shows a sister group relationship to the Astrophorida+Spirophorida clade. However, it should be mentioned here that other families of the order Spirophorida (Samidae and Spirasigmidae) are missing in our analysis and thus the exact classification of this clade is still in need of further investigations. Further, the homology and/or convergence of sigmatose microscleres still remains unclear and need further investigations. Our molecular findings that *Aciculites orientalis* (Scleritodermidae) is the sister to *Siphonidium* sp. (Siphonidiidae) is supported by morphological observations, where *Aciculites* has relatively more tuberculate rhizoclone desmas and *Siphonidium* has thorny and spined rhizoclone desmas, suggesting that both rhizoclone desmas are analogs and probably belong to different desma categories.

#### **Family Vetulinidae Lendenfeld, 1903**

Vetulinidae is represented by one genus and species (*Vetulina stalactites*). It is only known from the Caribbean (Barbados) and morphologically characterized by sphaeroclone desmas and the absence of ectosomal spicules and microscleres [73]. Based on morphological observations Van Soest & Stentoft (1988) [74] and Gruber (1993) [75] suggested a close relationship of *Vetulina* to the genera *Siphonidium* (Siphonidiidae) and *Leiodermatium* (Azoricidae). However, Pisera & Lévi (2002) [73] indicated these were weak assumptions and noted the occurrence of uniaxial or polyaxial sphaeroclone or astroclone-like desmas – not observed in any other lithistid or non-lithistid demosponges. Molecular investigations using different markers and fragments (18S and 28S rDNA, see also Tab.1) indicated with strong support the sister group relationship of *Vetulina* to freshwater sponges (Spongillida). Our study strongly confirms and corroborates these findings, for the first time using the mitochondrial CO1 gene. Morphologically, Spongillida differ from *Vetulina* by the presence of microscleres, megascleres and gemmoscleres and absence of sphaeroclone desmas [76]. One explanation could be that Spongillida lost its possession of sphaeroclone desmas, as this process seems more phylogenetically parsimonious than the evolution of new desmas. This

discrepancy of morphological versus molecular data remains unresolved at present and needs further attention. As 'Lithistida' is no longer an accepted ordinal taxon, and the genus *Vetulina* cannot be assigned to any other existing order of the Demospongiae (as well as their morphological differences to the Spongillida), lead us to the taxonomic action to resurrect Sphaerocladina for *Vetulina*, based on the existing paleontological concept of Sphaerocladina. Firstly, *Vetulina* has probably been separated from the order Spongillida for a long evolutionary time. Secondly, *Vetulina* has an unequivocally long and continuous history dating back to the Middle Jurassic to the present through the known fossil record [77]. Thirdly, in this particular case there is no reason to create a new higher taxon for a Recent genus when the taxonomic concept is otherwise identical to the continuous palaeontological concept of Sphaerocladina. The taxon Sphaerocladina Schrammen 1924 was first used as a Suborder to include fossil sponges with sphaeroclonar desmas, like those in *Vetulina*.

#### Family Desmanthidae Topsent, 1894

The family Desmanthidae comprises four genera: *Paradesmanthus* Pisera & Lévi, 2002, *Sulcastrella* Schmidt, 1879, *Desmanthus* Topsent, 1894 and *Petromica* Topsent, 1898. They are encrusting sponges with branching monocrepidial desmas. Ectosomal microscleres (sanidaster-like) are only found in the genus *Paradesmanthus*. Burton (1929) and de Laubenfels (1936) had already noted the similarity of these characters to other non-lithistid demosponges, and assumed a close relationship to the Halichondrida. Morphologically, desmas of *Petromica* are different from those found in other genera of this family, which would support the polyphyly of this family. Morphological descriptions of *Lithobubaris* (= *Sulcastrella*) confirm the close relationship of *Desmanthus*, *Sulcastrella* and *Paradesmanthus* to the bubarid genera *Monocrepidium* and *Bubaris* [78]. Pisera & Lévi (2002) [79] acknowledged the resemblance of all these genera to halichondrids. However, their precise placement is not possible based solely on morphological characters. Only a few previous molecular studies had included some species of this family. In the dataset of Morrow et al. (2012) [49] two partitions of the 28S rDNA gene highly supported the grouping of *Desmanthus* within Dictyonellidae *sensu* Morrow et al. (2012) [49]. This result was also supported by Redmond et al. (2013) [39] based on the analysis of the 18S rDNA. Here, we add for the first time an unlinked molecular marker, from the mtDNA CO1 gene, and support the assignment of *Desmanthus incrustans* to Dictyonellidae, and further, provide moderate support of a sister group relationship to the species *Dictyonella* sp. Based on morphological character analysis, Van Soest & Hajdu (2000) [80] suggested resurrecting the family Desmanthidae Topsent, 1893 within the 'Lithistida' demosponges for the genera *Desmanthus* and *Lithobubaris* (= *Sulcastrella*) by excluding *Petromica*. Redmond et al. (2013) [39] already formally reallocated the genera *Desmanthus*, *Sulcastrella* and *Paradesmanthus* to Bubaridae. In contrast, our molecular data, based on the mtDNA CO1 gene, strongly recommend the reallocation of *Desmanthus* to Dictyonellidae, as proposed by Cárdenas et al. (2012) [6]. Since no molecular data

for any species of the genera *Sulcastrella* and *Paradesmanthus* exists yet, for the time being we support their reallocation to the Bubaridae, as proposed by Redmond et al. (2013) [39]. Molecular data based on the 18S rDNA gene of the genus *Petromica* showed a close relationship to Halichondriidae *sensu* Morrow et al. (2012) [49]. Our analysis of mitochondrial CO1 sequences is consistent with their hypothesis. Additionally, our results display a strongly supported clade of the genus *Petromica* together with *Topsentia ophiraphidites* (Halichondriidae). This confirms earlier morphological findings of Van Soest & Zea (1986) [81]. Muricy et al. (2001) [82] amended the monophyly of *Petromica*, which is acknowledged in our molecular results, and showed support for the affinity with the Halichondriidae *sensu* Morrow et al. (2012). We therefore formally recommend reallocating *Petromica* close to halichondriids.

## Molecular phylogeny of desma-bearing astrophorids

### Family Corallistidae

Our molecular results (28S rDNA, C1–D2 partition) concerning the relationships within 'lithistids' provide strong evidence that the monophyletic family Corallistidae is closely related to *Pleroma* of the family Pleromidae. This outcome was expected from morphological observations, due to the similarity of desma structures. Megaclone desmas of *Pleroma* and dicranoclone desmas of Corallistidae might have originated in the same way and only final stages differ in these desmas. Additionally, dichotriaenes occur as ectosomal spicules in both families. Interestingly, no other astrophorids group with this clade, affirming the persistent occurrence of dicranoclone and megaclone desmas since the Paleozoic. Our molecular data further indicate that *Herengeria auriculata* is the sister-taxon to *Isabella mirabilis*. This relationship is morphologically supported with the main differences being the possession of euaster-like microscleres in *Isabella mirabilis* from the Norfolk Ridge [51]. Additionally, we confirmed the non-monophyly (CO1 gene tree) of the genus *Isabella* as also shown in the recent study of Carvalho et al. 2014 [83]. The sister group relationship of the species *Herengeria vasiformis* to a clade containing *H. auriculata*, *Isabella mirabilis*, *Neoschrammeniella castrum* and *N. norfolki* is highly supported. The polyphyly of the genus *Herengeria* could be explained by evidence of differing gross morphologies between the two species, indicative of taxonomic divergence. *Herengeria vasiformis* is vase-shaped and *H. auriculata* is much more massive; and *H. vasiformis* has thicker microxeas and more massive and less regularly developed rhabd-like spirasters, as well as smaller spirasters, as described by Schlacher-Hoenlinger et al. (2005) [51].

*Neoschrammeniella norfolki* differs from *N. castrum* and other genera of the family Corallistidae by the presence of plesiasters and absence of microxeas. When the genus *Corallistes* was included in the analyses, monophyly of the family Corallistidae was not supported in the study of Redmond et al. (2013) [39]. However, a "*Corallistes* sp. (AY737636)" formed a clade with *Neophrissospongia microstylifera*, while a "*Corallistes* sp. (AJ224646)" was not found to be related to Theonellidae. This is likely a consequence of misidentification of this taxon and/or

an inexact alignment compared to other sequences of Corallistidae. Considering all these aspects, the family Corallistidae should also be reallocated to Astrophorida.

#### Family Pleromidae

The family Pleromidae was recovered as polyphyletic, with *Pleroma menoui* closely related to Corallistidae and *Anaderma rancureli* to *Characella pachastrelloides* (Pachastrellidae). This is in agreement with our morphological character analysis, which also indicated its likely polyphyly. *Pleroma* lacks anatriaenes in contrast to *Anaderma*, which unequivocally includes them. Even though the relationship between *Anaderma* and *Characella* is not supported in our 28S rDNA gene tree, it might be conceivable based on the presence of similar morphological characters (e.g. anatriaenes) [68].

#### Family Macandrewiidae

The status of *Macandrewia* (Macandrewiidae) has been revised many times in the past, changing from affinities to Corallistidae [84] to belonging to *Callipelta* [32]. The possession of phyllotriaenes and desmas with triaenose crepis, however, supports a close relationship to other astrophorids. Due to the low variation within the 28S rDNA gene, it was not possible to determine the exact relationships with other lithistids or to astrophorid clades. Therefore, escalated taxon sampling, as well as gene sampling, needs to be improved in future to clarify the phylogenetic position of the family Macandrewiidae.

#### Family Phymaraphiniidae

The family Phymaraphiniidae contains three genera: *Exsuperantia* Özdikmen, 2009 [85], *Kaliapsis* Bowerbank, 1869 [86] and *Lepidothenea* de Laubenfels, 1936. Burton (1929) suggested a close relationship of *Exsuperantia* to Stellettidae due to its possession of phyllotriaenes. The original placement of *Exsuperantia* was with Theonellidae, due to similar ectosomal phyllotriaenes and microscleres as found in the genus *Racodiscula* (Theonellidae). However, the sculpture of the trider-like desmas (Fig. 3 G–H) clearly differentiate those two genera and families [87]. The only previous molecular analyses of *Exsuperantia* sp. did not support its close relationship with the tetracclone-bearing family Theonellidae [36]. Our results group *Exsuperantia* sp. as a sister to the astrophorid families Ancorinidae and Pachastrellidae, and the lithistid species *Anaderma rancureli*. However, neither BI nor ML values support this suggestion and so for the moment we allocate *Exsuperantia* to Astrophorida until further data is available. The phylogenetic position of the other two genera *Kaliapsis* and *Lepidothenea* will be the matter of further investigations.

#### Family Theonellidae

The family Theonellidae contains five genera: *Discodermia* du Bocage, 1869, *Manihinea* Pulitzer-Finali, 1993, *Racodiscula* Zittel, 1878, *Siliquariaspongia* Hoshino, 1981 and *Theonella* Gray, 1868. Theonellidae is characterized by ectosomal spicules ranging from phyllotriaenes to discotriaenes, choanosomal

tetraclone desmas and microscleres as acanthorhabds, microxeas, streptasters and amphiasters. Due to the possession of triaenes Theonellidae was usually considered to group with astrophorid sponges [24, 25, 27]. More recently there has been increased interest in bioactive compounds from theonellids [18], with the genera *Discodermia* and *Theonella* receiving special attention and resulting in the amplification of four different gene regions for *Discodermia* and three for *Theonella* (see Tab.1). Previous phylogenetic reconstructions based on mtDNA CO1 and 28S rDNA have shown that Theonellidae is monophyletic [36]. This result was in contrast to those observed from the 18S rDNA analysis [39]. Our present molecular analyses of both gene regions (mtDNA CO1 and 28S rDNA) strongly support the monophyly of Theonellidae, and additionally the sister group relationship of *Theonella* to *Discodermia*, supporting the conclusions of Cárdenas et al. (2011) [36]. A sister group relationship of Theonellidae and Corallistidae as proposed by earlier morphological [27] and molecular analyses [14], is not supported by any of our gene trees.

#### Family Phymatellidae

The family Phymatellidae contains three valid extant genera: *Neoaulaxinia* Pisera & Lévi, 2002, *Neosiphonia* Sollas, 1888 and *Reidispongia* Lévi & Lévi, 1988. Tetraclone desmas and dichotriaenes are the characteristic megascleres for the family, while the three genera are differentiated by the possession of different microscleres. Until the present study no molecular data existed for this group, and so its precise placement among the astrophorids remained uncertain. Here we show for the first time the monophyly of the family and its genera, and suggest a close relationship with the astrophorid family Pachastrellidae. Similar triaenes found in both families would support this moderately supported molecular sister group relationship. We therefore propose reallocating the family Phymatellidae to the Astrophorida.

#### Evolution of megascleres and microscleres in lithistid sponges

Our results suggest that desmas have evolved several times independently in different lithistid demosponge groups within the order Astrophorida. Furthermore, and conversely, secondary loss of desmas may have also occurred several times independently. However, the silica concentration of seawater has been shown to influence the development of spicules in demosponges [41], providing the possibility that if the silica concentration in seawater is low, desmas dis-articulate. So, if megascleres lose their function (e.g. as structural support for the cortex or as defense against predators), a secondary loss of megascleres is feasible. Microscleres have been lost frequently in the past within Tetractinellidae [36, 69].

## Conclusions

This study represents the first comprehensive molecular phylogenetic analysis of lithistid demosponges. We used two independent markers showing that at least 8 out of 13 lithistid families belong to the order Astrophorida. Further, we discovered Scleritodermidae and Siphonidiidae as a separate monophyletic group within the Tetractinellidae (Spirophorida+Astrophorida), however further investigation and inclusion of other spirophorids like Samidae and Spirasigmidae (not sampled here) is still pending in order to fully resolve the phylogenetic position of rhizoclone-bearing lithistids. We formally propose to reallocate most of the lithistid astrophorids. In addition, it is evident that Desmanthidae is polyphyletic and should be reallocated to their closest relatives within Halichondriidae. We also confirmed the sister-group relationship of the family Vetulinidae to Spongillida, and propose the resurrection of Sphaerocladina at the ordinal level to include both Recent and fossil taxa with obvious morphological apomorphies. Our suggested ancestral state reconstructions show possible secondary losses in spicule evolution within the desma-bearing astrophorids, and also indicate the possible deceptiveness of alleged morphological evidence for phylogenetic affinities based on non homologous characters, viz. flaws in the definition of particular spicule types (e.g. within the concept of “streptasters”), used historically as an important feature for sponge classification (see also Chombard et al. 1998 [42,68] or Cárdenas & Rapp 2013 [69]).

## Supporting Information

**S1 Table. Morphological character matrix.**

[doi:10.1371/journal.pone.0116038.s001](https://doi.org/10.1371/journal.pone.0116038.s001) (XLSX)

**S1 File. Description of morphological data matrix (S1 Table).**

[doi:10.1371/journal.pone.0116038.s002](https://doi.org/10.1371/journal.pone.0116038.s002) (DOCX)

## Acknowledgments

We thank Gabi Büttner, Simone Schätzle and Alexandra Scherer, Department of Earth- & Environmental Sciences, LMU Munich for assistance and support in the laboratory. We wish to thank people that contributed to the sampling of this study: Kathryn Hall, Merrick Ekins (Queensland Museum, Australia), Cecile Debitus (IRD Institut de recherche pour le développement, Papeete, Tahiti, French Polynesia), Rob W.M. van Soest NBC Naturalis Leiden, The Netherlands) and Oliver Gomez (Western Australia Museum, Perth, Australia).

AS wants to thank B. Knerr for his constant support during this study. This study is based on the Masters-Thesis of AS at the Faculty of Geosciences of the Ludwig-Maximilians-Universität München. Constructive comments on the study from Paco Cárdenas, Sergio Vargas and Oliver Voigt are highly appreciated.

## Author Contributions

Conceived and designed the experiments: GW AS DE. Performed the experiments: AS. Analyzed the data: AS. Contributed reagents/materials/analysis tools: DE AP JH JF GW. Wrote the paper: AS DE GW. Identification of specimens: AS AP JF JH MB.

## References

1. Sollas D (1885) A classification of the sponges. *Annals and Magazine of natural History* 5: 395.
2. Borchiellini C, Chombard C, Manuel M, Alivon E, Vacelet J, et al. (2004) Molecular phylogeny of Demospongiae: implications for classification and scenarios of character evolution. *Molecular Phylogenetics and Evolution* 32: 823–837.
3. Van Soest RWM, Boury-Esnault N, Hooper JNA, Rützler K, de Voogd NJ, et al. (2014) World Porifera database. Available: <http://www.marinespecies.org/porifera>. Accessed 2014 July 5.
4. Grant RE (1861) Tabular view on the primary divisions of the animal kingdom, intended to serve as a general outline of an elementary course of recent Zoology London. 1–91 p.
5. Erpenbeck D, Sutcliffe P, Cook SdC, Dietzel A, Maldonado M, et al. (2012) Horny sponges and their affairs: On the phylogenetic relationships of keratose sponges. *Molecular Phylogenetics and Evolution* 63: 809–816.
6. Cárdenas P, Pérez T, Boury-Esnault N (2012) Sponge systematics facing new challenges. In: Becerro MA, Uriz MJ, Maldonado M, Turon X, editors. *Advances in Sponge Science: Phylogeny, Systematics, Ecology*. Amsterdam, Boston, Heidelberg, London, New York, Oxford, Paris, San Diego, San Francisco, Singapore, Sydney, Tokyo: Elsevier. pp. 79–209.
7. Morrow CC, Redmond NE, Picton BE, Thacker RW, Collins AG, et al. (2013) Molecular phylogenies support homoplasy of multiple morphological characters used in the taxonomy of Heteroscleromorpha (Porifera: Demospongiae). *Integrative and Comparative Biology* 53: 428–446.
8. Schmidt EO (1870) *Grundzüge einer Spongien-Fauna des Atlantischen Gebietes*. Leipzig: Wilhelm Engelmann. 1–88 p.
9. Pisera A, Lévi C (2002) 'Lithistid' Demospongiae. In: Hooper JNA, Van Soest RWM, editors. *Systema Porifera A guide to the classification of sponges*. New York, Boston, Dordrecht, London, Moscow: Kluwer Academic/Plenum Publishers. pp. 299–301.
10. Hooper JNA, Lévi C (1989) *Esperiopsis desmophora* n. sp. (Porifera: Demospongiae): a desma-bearing Poecilosclerida. *Memoirs of the Queensland Museum* 27: 437–441.
11. List-Armitage SE, Hooper JNA (2002) Discovery of *Petromica* Topsent in the Pacific Ocean: a revision of the genus with a new subgenus (*Chaladesma* subgen. nov.) and a new species (*P. (C.) pacifica* sp. nov.), (Porifera: Demospongiae: Halichondrida: Halichondriidae). *Invertebrate Systematics* 16: 813–835.
12. Pisera A (2002) Fossil Lithistids: an overview. In: Hooper JNA, Van Soest RWM, editors. *Systema Porifera A guide to the classification of sponges*. New York, Boston, Dordrecht, London, Moscow: Kluwer Academic/Plenum Publishers. pp. 388–402.
13. Pisera A (1999) Post Paleozoic history of the siliceous sponges with rigid skeleton. *Memoirs of the Queensland Museum* 44: 463–472.
14. Kelly Borges M, Pomponi SA (1994) Phylogeny and classification of lithistid sponges (Porifera: Demospongiae): a preliminary assessment using ribosomal DNA sequence comparisons. *Molecular Marine Biology and Biotechnology* 3: 87–103.
15. Pisera A, Vacelet J (2011) Lithistid sponges from submarine caves in the Mediterranean: taxonomy and affinities. *Scientia Marina* 75: 17–40.
16. Manconi R, Serusi A (2008) Rare sponges from marine caves: discovery of *Neophrissospongia nana* nov sp (Demospongiae, Corallistidae) from Sardinia with an annotated checklist of Mediterranean lithistids. *Zookeys*: 71–87.



17. **Pisera A, Schuster A, Al Mourabit A, Curvat X, Hertrich L, et al.** (2013) First record of lithistid sponge from the submarine caves from the Nuku Hiva (Marquesas Islands) and Tahiti Iti (Society Islands), French Polynesia. 9th World Sponge Conference. Fremantle, Western Australia. pp.109.
18. **Wright AE** (2010) The Lithistida: important sources of compounds useful in biomedical research. *Current Opinion in Biotechnology* 21: 801–807.
19. **Windler PL, Pomponi SA, Wright AE** (2011) Natural Products from the Lithistida: A Review of the Literature since 2000. *Marine Drugs* 9: 2643–2682.
20. **Sollas WJ** (1888) Report on the Tetractinellida collected by HMS 'Challenger' during the years 1873–76. London, Edinburgh, Dublin: Her Majesty's Stationary Office. 1–458 p.
21. **Dendy A** (1905) Report on the sponges collected by Professor Herdman, at Ceylon, in 1902. In: Herdman WA, , editor. Report to the Government of Ceylon on the pearl oyster Fisheries of the Gulf of Manaar. London: Royal Society. pp. 57–246.
22. **Schrammen A** (1910) Die Kieselspongien der oberen Kreide von Nordwestdeutschland. I. Teil. Tetraxonia, Monaxonia and Silicea incertae sedis. *Palaeontographica* 5: 1–175.
23. **Wilson HV** (1925) Silicious and horny sponges collected by the US Fisheries Steamer 'Albatross' during the Philippine Expedition, 1907–10. In Contributions to the Biology of the Philippine Archipelago and Adjacent Regions. *Bulletin of the United States National Museum* 100: 273–532.
24. **Burton M** (1929) Description of South African sponges collected in the South African Marine Survey. Part II. The 'Lithistidae', with critical survey of the desma-forming sponges. *Fisheries Bulletin Fisheries and Marine Biological Survey Division, Union of South Africa Report 7 Special Report 2*: 1–12.
25. **De Laubenfels MW** (1936) A discussion of the sponge fauna of the Dry Tortugas in particular and the West Indies in general, with material for a revision of the families and orders of the Porifera. *Publications Carnegie Institute Washington* 467 (Papers Tortugas Laboratory) 30: 1–225.
26. **Bergquist PR** (1978) Sponges. London: Hutchinson University Library.
27. **Lévi C** (1973) Systématique de la classe des Demospongiaria (Demosponges). In: Brien P, Lévi C, Sarà M, Tuzet O, Vacelet J, editors. *Traité de Zoologie Anatomie, Systématique, Biologie III Spongiaires*. Paris: Masson et Cie. pp. 577–631.
28. **Lévi C** (1991) Lithistid sponges from the Norfolk Rise, Recent and Mesozoic genera. In: Reitner J, Keupp H, editors. *Fossil and Recent Sponges*. Berlin, Heidelberg: Springer-Verlag. pp. 72–82.
29. **Topsent E** (1894) Etude monographique des spongiaires de France. I. Tetractinellida. *Archives de Zoologie Expérimentale et Générale* 3: 259–400.
30. **Schrammen A** (1924) Die Kieselspongien der oberen Kreide von Nordwestdeutschland. III. und letzter Teil. *Monographien zur Geologie und Paläontologie* 1: 1–159.
31. **von Lendenfeld R** (1903) Tetraxonia. In: Schulze FE, editor. *Das Tierreich*. Berlin: Friedländer. pp. 1–168.
32. **Kelly M** (2000) Description of a new lithistid sponge from northeastern New Zealand, and consideration of the phylogenetic affinities of families Corallistidae and Neopeltidae. *Zoosystema* 22: 265–283.
33. **Reid REH** (1963) A classification of the Demospongia. *Neues Jahrbuch für Mineralogie, Geologie, Paläontologie Abhandlungen* 4: 196–207.
34. **Reid REH** (1970) Tetraxons and demosponge phylogeny. In: Fry WG, editor. *Biology of the Porifera*. London: Zoological Society of London Symposia, Academic Press. pp. 415–422.
35. **Kelly-Borges M, Pomponi SA** (1994) Phylogeny and classification of lithistid sponges (Porifera: Demospongiae): a preliminary assessment using ribosomal DNA sequence comparisons. *Molecular Marine Biology and Biotechnology* 3: 87–103.
36. **Cárdenas P, Xavier J, Reveillaud J, Schander C, Rapp H** (2011) Molecular phylogeny of the Astrophorida (Porifera, Demospongiae) reveals an unexpected high level of spicule homoplasy. *PLoS ONE* 6: e18318.
37. **Erpenbeck D, Wörheide G** (2007) On the molecular phylogeny of sponges (Porifera). *Zootaxa*: 107–126.

38. **McInerney JO, Adams CL, Kelly M** (1999) Phylogenetic resolution potential of 18s and 28s rRNA genes within the lithistid Astrophorida. In: Hooper JNA, editor. *Memoirs of the Queensland Museum, Proceedings of the 5th International Sponge Symposium, Brisbane, June-July 1998*. pp. 343–352.
39. **Redmond NE, Morrow CC, Thacker RW, Díaz MC, Boury-Esnault N, et al.** (2013) Phylogeny and systematics of Demospongiae in light of new small-subunit ribosomal DNA (18S) sequences. *Integrative and Comparative Biology* 53: 388–415.
40. **Uriz MJ, Maldonado M** (1995) A reconsideration of the relationship between polyaxonid and monaxonid spicules in Demospongiae: new data from the genera *Crambe* and *Discorhabdella* (Porifera). *Biological Journal of the Linnean Society* 55: 1–15.
41. **Maldonado M, Carmona MC, Uriz MJ, Cruzado A** (1999) Decline in Mesozoic reef-building sponges explained by silicon limitation. *Nature*. pp.785–788.
42. **Chombard C, Boury-Esnault N, Tillier S** (1998) Reassessment of homology of morphological characters in tetractinellid sponges based on molecular data. *Systematic Biology* 47: 351–366.
43. **Jenner RA** (2004) When molecules and morphology clash: reconciling conflicting phylogenies of the Metazoa by considering secondary character loss. *Evolution & Development* 6: 372–378.
44. **Van Soest RWM** (2014) Tetractinellida. Van Soest, RWM; Boury-Esnault, N; Hooper, JNA; Rützler, K; de Voogd, NJ; Alvarez de Glasby, B; Hajdu, E; Pisera, AB; Manconi, R; Schoenberg, C; Janussen, D; Tabachnick, KR; Klautau, M; Picton, B; Kelly, M; Vacelet, J; Dohrmann, M; Díaz, M-C; Cárdenas, P (2014) World Porifera database Accessed through: Van Soest, RWM; Boury-Esnault, N; Hooper, JNA; Rützler, K; de Voogd, NJ; Alvarez de Glasby, B; Hajdu, E; Pisera, AB; Manconi, R; Schoenberg, C; Janussen, D; Tabachnick, KR; Klautau, M; Picton, B; Kelly, M; Vacelet, J; Dohrmann, M; Díaz, M-C; Cárdenas, P (2014) World Porifera database. Available: <http://www.marinespecies.org/porifera/poriferaph?p=taxdetails&id=597812>. Accessed 2014 October 31.
45. **Addis JS, Peterson KJ** (2005) Phylogenetic relationships of freshwater sponges (Porifera, Spongillina) inferred from analyses of 18S rDNA, COI mtDNA, and ITS2 rDNA sequences. *Zoologica Scripta* 34: 549–557.
46. **Erpenbeck D, Hooper JNA, List-Armitage SE, Degnan BM, Wörheide G, et al.** (2007) Affinities of the family Sollasellidae (Porifera, Demospongiae). II. Molecular evidence. *Contributions to Zoology* 76: 95–102.
47. **Hill MS, Hill AL, Lopez J, Peterson KJ, Pomponi S, et al.** (2013) Reconstruction of family-level phylogenetic relationships within Demospongiae (Porifera) using nuclear encoded housekeeping genes. *PLoS ONE* 8: e50437.
48. **Nichols SA** (2005) An evaluation of support for order-level monophyly and interrelationships within the class Demospongiae using partial data from the large subunit rDNA and cytochrome oxidase subunit I. *Molecular Phylogenetics and Evolution* 34: 81–96.
49. **Morrow CC, Picton BE, Erpenbeck D, Boury-Esnault N, Maggs CA, et al.** (2012) Congruence between nuclear and mitochondrial genes in Demospongiae: A new hypothesis for relationships within the G4 clade (Porifera: Demospongiae). *Molecular Phylogenetics and Evolution* 62: 174–190.
50. **Thacker RW, Hill AL, Hill MS, Redmond NE, Collins AG, et al.** (2013) Nearly complete 28S rRNA gene sequences confirm new hypotheses of sponge evolution. *Integrative and Comparative Biology* 53: 373–387.
51. **Schlacher-Hoenlinger MA, Pisera A, Hooper JNA** (2005) Deep-sea "lithistid" assemblages from the Norfolk Ridge (New Caledonia), with description of seven new species and a new genus (Porifera, Demospongiae). *Zoosystema* 27: 649–698.
52. **Ivanova NV, Dewaard JR, Hebert PDN** (2006) An inexpensive, automation-friendly protocol for recovering high-quality DNA. *Molecular Ecology Notes* 6: 998–1002.
53. **Vargas S, Schuster A, Sacher K, Büttner G, Schätzle S, et al.** (2012) Barcoding Sponges: An Overview Based on Comprehensive Sampling. *PLoS ONE* 7: e39345.
54. **Meyer CP, Geller JB, Paulay G** (2005) Fine scale endemism on coral reefs: Archipelagic differentiation in turbinid gastropods. *Evolution* 59: 113–125.
55. **Cárdenas P, Rapp HT, Schander C, Tendal O** (2009) Molecular taxonomy and phylogeny of the Geodiidae (Porifera, Demospongiae, Astrophorida) - combining phylogenetic and Linnaean classification. *Zoologica Scripta*: 1–18.

56. **Lê HLV, Lecointre G, Perasso R** (1993) A 28S rRNA-based phylogeny of the gnathostomes: first steps in the analysis of conflict and congruence with morphologically based cladograms. *Molecular phylogenetics and evolution* 2: 31–51.
57. **Sambrook E, Fritsch F, Maniatis T** (1989) *Molecular cloning*. Cold Spring Harbor, New York: Cold Spring Harbor Press.
58. **Edgar RC** (2004) MUSCLE: multiple sequence alignment with high accuracy and high throughput. *Nucleic Acids Research* 32: 1792–1797.
59. **Galtier N, Lobry JR** (1997) Relationships between genomic G+C content, RNA secondary structures, and optimal growth temperature in prokaryotes. *Journal of Molecular Evolution* 44: 632–636.
60. **Xia X, Xie Z, Salemi M, Chen L, Wang Y** (2003) An index of substitution saturation and its application. *Molecular Phylogenetics and Evolution* 26: 1–7.
61. **Xia X, Xie Z** (2001) DAMBE: Software Package for Data Analysis in Molecular Biology and Evolution. *The Journal of Heredity* 92: 371–373.
62. **Wörheide G, Dohrmann M, Erpenbeck D, Larroux C, Maldonado M, et al.** (2012) Deep phylogeny and evolution of sponges (Phylum Porifera). *Advances in Marine Biology* 61: 1–78.
63. **Ronquist F, Huelsenbeck JP** (2003) MrBayes 3: Bayesian phylogenetic inference under mixed models. *Bioinformatics* 19: 1572–1574.
64. **Huelsenbeck JP, Ranala B** (2004) Frequentist properties of Bayesian posterior probabilities of phylogenetic trees under simple and complex substitution models. *Systematic Biology* 53: 904–913.
65. **Silvestro D, Michalak I** (2011) raxmlGUI: a graphical front-end for RAxML. *Organisms Diversity & Evolution* 12: 335–337.
66. **Stover BC, Müller KF** (2010) TreeGraph 2: combining and visualizing evidence from different phylogenetic analyses. *BMC bioinformatics* 11: 7.
67. **Maddison WP, Maddison DR** (2011) Mesquite: a modular system for evolutionary analysis. Version 2.75. Available: <http://mesquiteproject.org>. Accessed 2014 December 13.
68. **Cárdenas P, Rapp HT** (2012) A review of Norwegian streptaster-bearing Astrophorida (Porifera: Demospongiae: Tetractinellida), new records and a new species. *Zootaxa* 3253: 1–52.
69. **Szitenberg A, Becking LE, Vargas S, Fernandez JCC, Santodomingo N, et al.** (2013) Phylogeny of Tetillidae (Porifera, Demospongiae, Spirophorida) based on three molecular markers. *Molecular Phylogenetics and Evolution* 67: 509–519.
70. **Pisera A, Lévi C** (2002) Family Scleritodermidae Sollas, 1888. In: Hooper JNA, Van Soest RWM, editors. *Systema Porifera A guide to the classification of sponges*. New York, Boston, Dordrecht, London, Moscow: Kluwer Academic/Plenum Publishers. pp. 302–311.
71. **Pisera A, Lévi C** (2002) Family Azoricidae Sollas, 1888. In: Hooper JNA, Van Soest RWM, , editors. *Systema Porifera A guide to the classification of sponges*. New York, Boston, Dordrecht, London, Moscow: Kluwer Academic/Plenum Publishers. pp. 352–355.
72. **Nichols S** (2005) An evaluation of support for order-level monophyly and interrelationships within the class Demospongiae using partial data from the large subunit rDNA and cytochrome oxidase subunit I. *Molecular Phylogenetics and Evolution* 34: 81–96.
73. **Pisera A, Lévi C** (2002) Family Vetulinidae Lendenfeld, 1903. In: Hooper JNA, Van Soest RWM, editors. *Systema Porifera A guide to the classification of sponges*. New York, Boston, Dordrecht, London, Moscow: Kluwer Academic/Plenum Publishers. pp. 363–365.
74. **Van Soest RWM, Stentoft N** (1988) Barbados deep-water sponges. *Studies on the Fauna of Curaçao and Other Caribbean Islands* 70: 1–175.
75. **Gruber G** (1993) Mesozoische und rezente desmentragende Demospongiae (Porifera, "Lithistida") (Palaobiologie, Phylogenie und Taxonomie). *Berliner Geowissenschaftliche Abhandlungen Reihe E Palaeobiologie* 10: 1–73.
76. **Manconi R, Pronzato R** (2002) Suborder Spongillina subord. nov.: Freshwater sponges. In: Hooper JNA, Van Soest RWM, editors. *Systema Porifera A guide to the classification of sponges*. New York, Boston, Dordrecht, London, Moscow: Kluwer Academic/Plenum Publishers. pp. 921–1020.

77. **Rigby JK, Finks RM, Reid REH** (2004) Treatise on invertebrate paleontology, Part E, Porifera revised; Kaesler RL, editor: The Geological Society of America. 349 p.
78. **Vacelet J** (1969) Éponges de la roche du large et de l'étage bathyal de Méditerranée. Mémoires du Muséum National d'Histoire Naturelle (A) 59: 145–219.
79. **Pisera A, Lévi C** (2002) Family Desmanthidae Topsent, 1893. In: Hooper JNA, Van Soest RWM, editors. Systema Porifera A guide to the classification of sponges. New York, Boston, Dordrecht, London, Moscow: Kluwer Academic/Plenum Publishers. pp. 356–362.
80. **Van Soest RWM, Hajdu E** (2000) new species of *Desmanthus* (Porifera, Demospongiae) with a discussion of its ordinal relationships. Zoosystema 22: 299–312.
81. **Van Soest RWM, Zea S** (1986) A new sublithistid sponge *Monanthus ciocalyptoides* nsp (Porifera, Halichondrida), from the West Indian region. Bulletin Zoologisch Museum Universiteit van Amsterdam 10: 201–205.
82. **Muricy G, Hajdu E, Minervino JV, Madeira AV, Peixinho S** (2001) Systematic revision of the genus *Petromica* Topsent (Demospongiae: Halichondrida), with a new species from the southwestern Atlantic. Hydrobiologia. pp.103–128.
83. **Carvalho FC, Pomponi S, Xavier JR** (2014) Lithistid sponges of the upper bathyal of Madeira, Selvagens and Canary Islands, with description of a new species of *Isabella* Journal of the Marine Biological Association of the United Kingdom: 1–10.
84. **Pisera A, Lévi C** (2002) Family Macandrewiidae Schrammen, 1924. In: Hooper JNA, Van Soest RWM, editors. Systema Porifera A guide to the classification of sponges. New York, Boston, Dordrecht, London, Moscow: Kluwer Academic/Plenum Publishers. pp. 377–379.
85. **Özdikmen H** (2009) Substitute names for eight sponge genus group names (Porifera). Mun Ent Zool 4: 212–218.
86. **Bowerbank JS, Norman AM** (1869) A Monograph of the Siliceo-fibrous Sponges Parts I, II. Proceedings of the Zoological Society of London 1869: 66–100, 323–351.
87. **Pisera A, Lévi C** (2002) Family Phymaraphiniidae Schrammen, 1910. In: Hooper JNA, Van Soest RWM, editors. Systema Porifera A guide to the classification of sponges. New York, Boston, Dordrecht, London, Moscow: Kluwer Academic/Plenum Publishers. pp. 380–383.
